# Supplementary material
Source: PubMed Central journal article supplement (PMC4334230)

# Supporting information

## Inducamides A–C, Chlorinated Alkaloids from a RNA Polymerase Mutant Strain of *Streptomyces* sp.

Peng Fu,<sup>†</sup> Matthew Jamison,<sup>†</sup> Scott La, and John B. MacMillan\*

*Department of Biochemistry, University of Texas Southwestern Medical Center at  
Dallas, Dallas, Texas 75390, United States*

<sup>†</sup>Contributed equally to this work.

*john.macmillan@utsouthwestern.edu*

### Contents:

- I. Experimental details
- II. NMR table for inducamide C (3)
- III. NMR spectra for inducamides A–C (1–3)

## I. Experimental details

**General Procedures.** Optical rotations were recorded with an AUTOPOL AP IV-6W polarimeter equipped with a halogen lamp (589 nm). UV spectra were recorded on a Shimadzu UV-1601 UV–VIS spectrophotometer. <sup>1</sup>H and 2D NMR spectral data were recorded at 600 MHz in CD<sub>3</sub>OD or DMSO-*d*<sub>6</sub> solution on Varian System spectrometer, and chemical shifts were referenced to the corresponding residual solvent signal ( $\delta_{\text{H}}$  3.31/ $\delta_{\text{C}}$  49.00 for CD<sub>3</sub>OD, and  $\delta_{\text{H}}$  2.50/ $\delta_{\text{C}}$  39.52 for DMSO-*d*<sub>6</sub>). <sup>13</sup>C NMR spectra were acquired at 100 MHz on a Varian System spectrometer. High resolution ESI-TOF mass spectra were provided by The Scripps Research Institute, La Jolla, CA. Low-resolution LC/ESI-MS data were measured using an Agilent 1200 series LC/MS system with a reversed-phase C<sub>18</sub> column (Phenomenex Luna, 150 mm × 4.6 mm, 5 μm) at a flow rate of 0.7 mL/min. Preparative HPLC was performed on an Agilent 1200 series instrument with a DAD detector, using a Phenyl-Hexyl column (Phenomenex Luna, 250 × 10.0 mm, 5 μm). Sephadex LH-20 (GE Healthcare, Sweden) and ODS (50 mm, Merck) were used for column chromatography.

**Collection and phylogenetic analysis of strain SNC-109.** *Streptomyces* sp. strain SNC-109 was isolated from a sediment sample collected from a mangrove in Vava'u, Tonga (18°38'6'' S, 133°56'6'' W). The sediment was desiccated and stamped onto agar plates using a starch media containing cadaverine and spermidine (10 g starch, 10 μM cadaverine, 10 μM spermidine, 1 L seawater, 15 g agar). Bacterial colonies were selected and streaked to purity using the same agar media. Analysis of the strain by 16S rRNA revealed 99.7% identity to *Streptomyces koyangensis*. The sequence is deposited in GenBank under accession no. KM502784.

**Mutants from SNC-109.** Mutants were generated in liquid culture through the use of rifampicin. Rifampicin was added to four 50 mL cultures of growth phase *Streptomyces* sp. strain SNC-109 to create a final concentration of 0.1, 0.2, 0.5, and 1 μM. At days 4 and 6, 200 μL culture aliquots were spread on A1+C agar plate (10 g starch, 4 g yeast extract, 2 g peptone, 1 g CaCO<sub>3</sub>, 40mg Fe<sub>2</sub>(SO<sub>4</sub>)<sub>3</sub>·4H<sub>2</sub>O, 100 mg KBr, 1L seawater, 15 g agar) containing a matching concentration of rifampicin. Colonies were detected from the cultures treated with 0.2 mM (day 4) and 0.5 mM (day 4, day 6) rifampicin, giving rise to mutant strains M1 – M3. All three strains had a dramatic change in resistance to rifampicin, with resistance > 0.5 mM. Resistance was determined by highest concentration which showed no inhibition by disk diffusion assay. In order to determine if resistance was due to mutations in the B subunit of bacterial RNA polymerase (*rpoB*), primers designed by the Ochi lab were used to amplify a section of *rpoB* in SNC-109 and the three mutant strains. Strains M1-M3 all had mutations in *rpoB* as shown in Figure 2b of the manuscript. Strain SNC-109-M3 was verified to originate from strain SNC-109 by comparison of 16S rRNA sequences, with the sequence of SNC-109-M3 being submitted to GenBank under the accession

no. KM974915

**Cultivation and extraction.** Mutant strain SNC-109-M3 was cultured in 20 × 2.8 L Fernbach flasks each containing 1 L of a seawater-based medium (10 g starch, 4 g yeast extract, 2 g peptone, 1 g CaCO<sub>3</sub>, 40mg Fe<sub>2</sub>(SO<sub>4</sub>)<sub>3</sub>·4H<sub>2</sub>O, 100 mg KBr) and shaken at 200 rpm at 27 °C. After seven days of cultivation, sterilized XAD-7-HP resin (20 g/L) was added to adsorb the organic products, and the culture and resin were shaken at 200 rpm for 2 h. The resin was filtered through cheesecloth, washed with deionized water, and eluted with acetone. The acetone-soluble fraction was dried *in vacuo* to yield 7.4 g of extract.

**Isolation.** The extract (7.4 g) was partitioned with EtOAc and MeOH/H<sub>2</sub>O. The EtOAc soluble layer (760 mg) was fractionated by flash column chromatography on ODS (50 μm, 30 g), eluting with a step gradient of MeOH and H<sub>2</sub>O (20:80–100:0), and 40 fractions (Fr.1–Fr.40) were collected. Fractions 15–18 (60.4 mg) were combined and separated into three fractions (Fr.15.1–Fr.15.3) on Sephadex LH-20, eluting with MeOH. Fr.15.1 (30.2 mg) was purified by reversed phase HPLC (Phenomenex Luna, Phenyl-Hexyl, 250 × 10.0 mm, 2.5 mL/min, 5 μm, UV = 254 nm) using a gradient solvent system from 40% to 100% CH<sub>3</sub>CN (0.1% formic acid) over 15 min to afford compound **2** (16.3 mg, *t<sub>R</sub>* = 10.0 min). Fractions 21–24 (68.1 mg) were combined and purified by Sephadex LH-20 eluting with MeOH to give compound **1** (24.1 mg). Fr.25 (7.6 mg) was purified by reversed phase HPLC (Phenomenex Luna, Phenyl-Hexyl, 250 × 10.0 mm, 2.5 mL/min, 5 μm, UV = 210 nm) using a gradient solvent system from 20% to 100% CH<sub>3</sub>CN (0.1% formic acid) over 15 min to afford compound **3** (2.5 mg, *t<sub>R</sub>* = 14.9 min).

**Inducamide A (1):** white solid,  $[\alpha]_D^{24}$  –18 (*c* 0.1, MeOH); UV(MeOH)  $\lambda_{\max}$  (log  $\epsilon$ ): 228 (4.6), 287 (3.8) nm; CD (MeOH)  $\lambda_{\max}$  ( $\Delta\epsilon$ ) 233 (–10.5), 205 (+4.6) nm; <sup>1</sup>H and <sup>13</sup>C NMR, see Table 1; HRESIMS *m/z* 405.0413 [M – H]<sup>–</sup> (calcd for C<sub>19</sub>H<sub>15</sub>N<sub>2</sub>O<sub>4</sub>Cl<sub>2</sub>, 405.0414).

**Inducamide B (2):** white solid,  $[\alpha]_D^{24}$  –10 (*c* 0.05, MeOH); UV(MeOH)  $\lambda_{\max}$  (log  $\epsilon$ ): 222 (4.6), 290 (3.8) nm; CD (MeOH)  $\lambda_{\max}$  ( $\Delta\epsilon$ ) 228 (–5.2), 205 (+4.2) nm; <sup>1</sup>H and <sup>13</sup>C NMR, see Table 1; HRESIMS *m/z* 373.0948 [M + H]<sup>+</sup> (calcd for C<sub>19</sub>H<sub>18</sub>N<sub>2</sub>O<sub>4</sub>Cl, 373.0950).

**Inducamide C (3):** white solid,  $[\alpha]_D^{24}$  –28 (*c* 0.1, MeOH); UV(MeOH)  $\lambda_{\max}$  (log  $\epsilon$ ): 225 (4.8), 284 (4.1) nm; CD (MeOH)  $\lambda_{\max}$  ( $\Delta\epsilon$ ) 307 (+5.2), 286 (–5.5), 234 (+56.8), 222 (–8.7) nm; <sup>1</sup>H and <sup>13</sup>C NMR, see Table S1; HRESIMS *m/z* 403.0271 [M – H]<sup>–</sup> (calcd for C<sub>19</sub>H<sub>13</sub>N<sub>2</sub>O<sub>4</sub>Cl<sub>2</sub>, 403.0258).

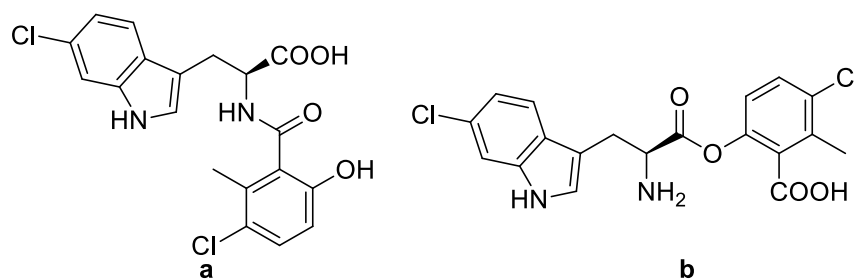

**Figure S1.** The possible structures of **1**

**Methylation of 1 with TMS-CHN<sub>2</sub>.** A solution of compound **1** (0.2 mg) in MeOH (anhydrous, 0.4 mL) was added 100  $\mu$ L of TMS-CHN<sub>2</sub> (2.0 M in Et<sub>2</sub>O). After allowing to stir for 1 h, solution was removed *via* N<sub>2</sub> and the reaction mixture was analyzed by LC-MS. The result showed the presence of two methyl groups corresponding to formation of a methyl ester at C-20 and a C-15 methyl ether (Scheme S1).

**Scheme S1.** Methylation of **1** with TMS-CHN<sub>2</sub>

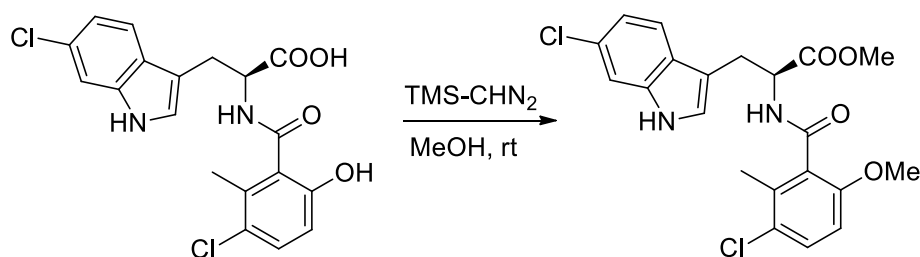

**Absolute configuration determination of 1 and 2 by Marfey's method.** A solution of **1** (0.5 mg) in 6 M HCl (0.5 mL) was heated at 110 °C for 19 h. The solution was then evaporated to dryness and redissolved in H<sub>2</sub>O (250  $\mu$ L). 100  $\mu$ L of the acid hydrolysates solution was then placed in a 4 mL vial and treated with 1% solution of L-FDVA (100  $\mu$ L) in acetone followed by 1.0 M NaHCO<sub>3</sub> (40  $\mu$ L). The reaction mixture was heated at 45 °C for 1 h, cooled to room temperature, and then acidified with 1.0 M HCl (40  $\mu$ L). In a similar fashion, standard 6-Cl-L-Trp was derivatized with L-FDVA and D-FDVA. The derivatives of the hydrolysates and standard amino acid were subjected to HPLC analysis (Phenomenex Luna C<sub>18</sub> column; 5  $\mu$ m, 4.6  $\times$  150 mm; 0.7 mL/min) using the following gradient program: solvent A, water + 0.1% FA; solvent B, MeCN + 0.1% FA; linear gradient: 0 min 25% B, 40 min 60% B; UV detection at 340 nm. The retention times for the L-FDVA derivatives of hydrolysates of **1** and standard 6-Cl-L-Trp were all 24.1 min, while the retention time for the D-FDVA derivative of standard 6-Cl-L-Trp was 28.1 min (Figure S1). Compound **2** was hydrolyzed and then derivatized with L-FDAA by the same procedure. Standard L-Trp and DL-Trp were also derivatized with L-FDAA. HPLC analysis showed that the retention times for L-FDAA derivatives of hydrolysates of **2**, standard L-Trp and standard D-Trp were 17.5, 17.5 and 19.1 min, respectively.

**Figure S2.** The determination of the absolute configurations of **1** and **2**

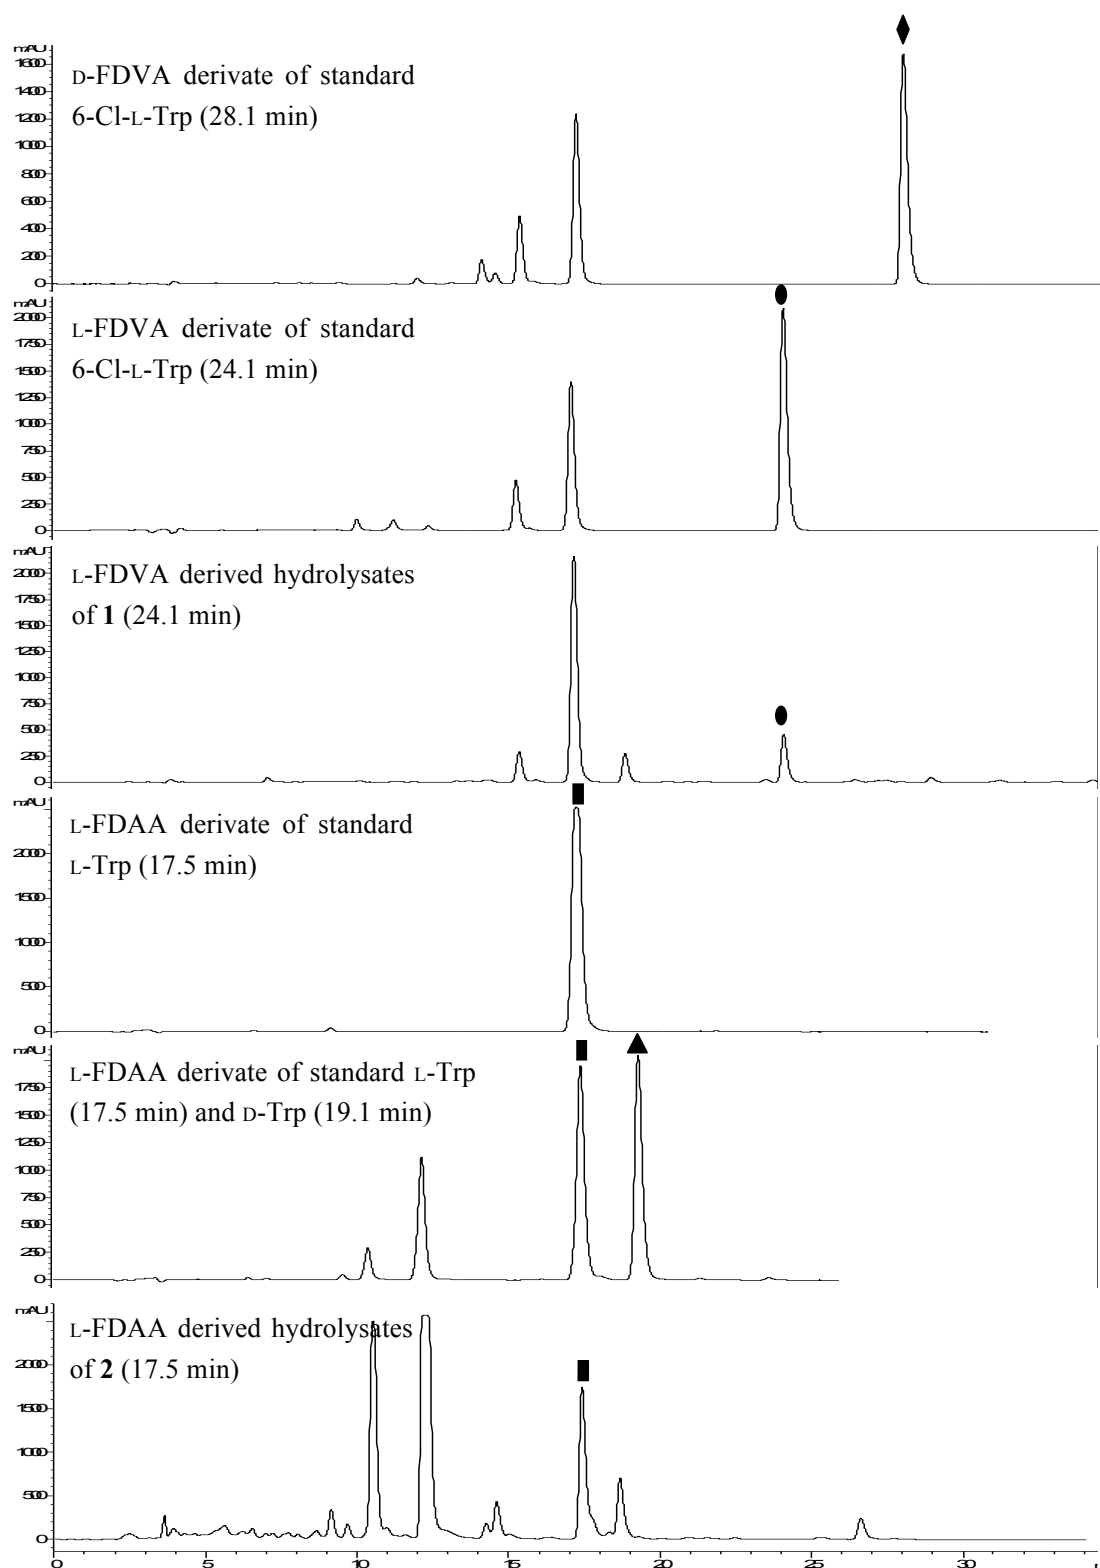

**Antibiotic assays.** The antibiotic activities against *Pseudomonas aeruginosa* and *Bacillus subtilis* were evaluated by an agar dilution method. The tested strains were cultivated in LB agar plates at 37 °C. Compounds **1–3** and positive control (erythromycin) were dissolved in MeOH at different concentrations from 100 to 0.1  $\mu\text{g/mL}$  by the continuous 10-fold dilution methods. A 10  $\mu\text{L}$  quantity of test solution was absorbed by a paper disk (5 mm diameter) and placed on the assay plates. After 24 h incubation, zones of inhibition (mm in diameter) were recorded.

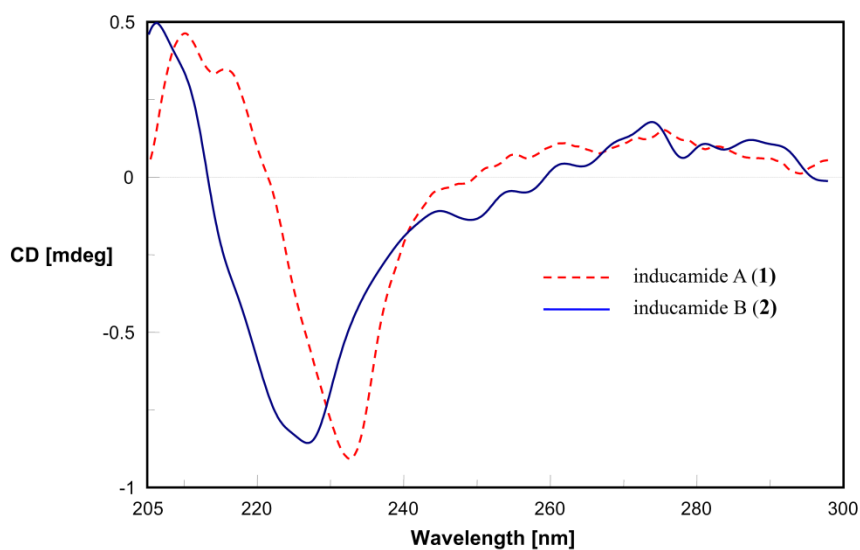

**Figure S3.** CD spectra of inducamides A and B (**1** and **2**) in MeOH at 0.049 and 0.054 mM, respectively.

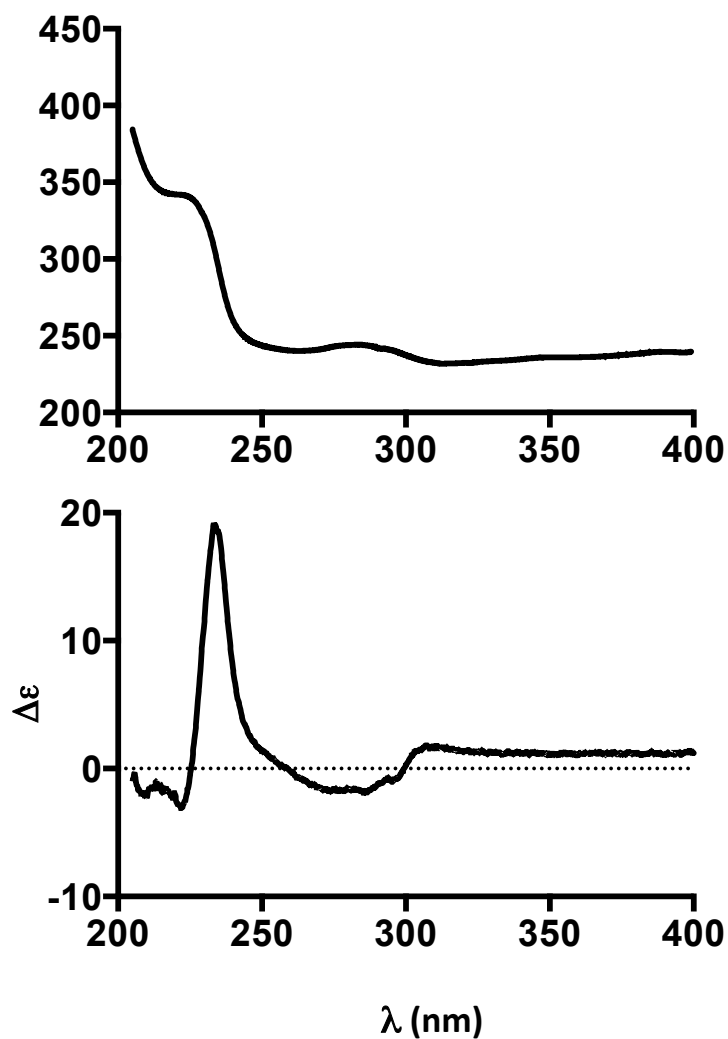

**Figure S4.** UV and CD spectra of inducamide C (**3**) at 0.1 mM in MeOH.

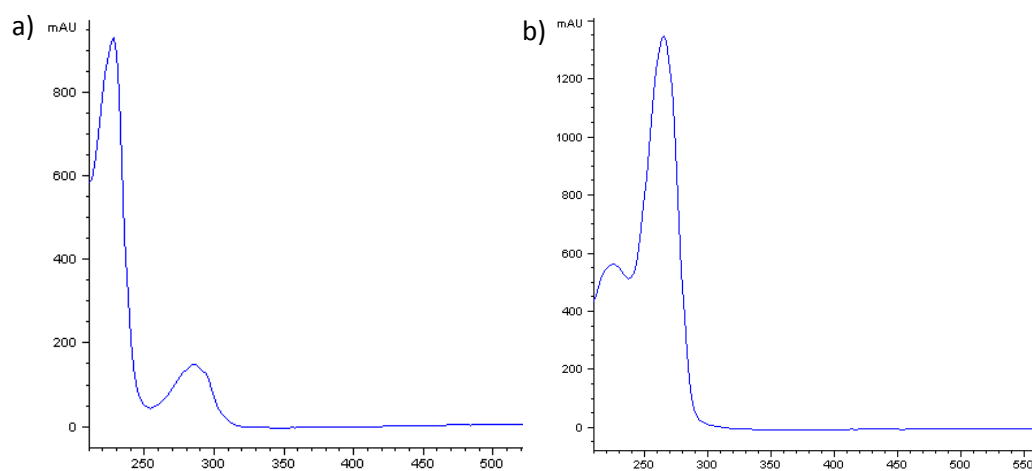

**Figure S5.** UV profiles of a) inducamide B. b) major peak at 7.5 minutes in the LC-MS trace of wild type SNC-109 referred to in figure 2c. This peak is also present in mutant strain SNC-109-M3.

## II. NMR table for inducamide C (3)

**Table S1.**  $^1\text{H}$  (600 MHz) and  $^{13}\text{C}$  (100 MHz) NMR Data for Compound **3** in  $\text{DMSO-}d_6$

| no.   | $\delta_{\text{C}}$ | $\delta_{\text{H}}$ , mult. ( $J$ in Hz)   |
|-------|---------------------|--------------------------------------------|
| 2     | 126.3, CH           | 7.26, s                                    |
| 3     | 113.0, C            |                                            |
| 4     | 152.4, C            |                                            |
| 5     | 109.2, CH           | 6.45, s                                    |
| 6     | 125.2, C            |                                            |
| 7     | 107.7, CH           | 7.10, s                                    |
| 8     | 139.5, C            |                                            |
| 9     | 118.4, C            |                                            |
| 10    | 32.7, $\text{CH}_2$ | 3.33, dd (13.8, 4.6); 2.90, dd (13.8, 8.8) |
| 11    | 59.2, CH            | 4.30, dd (8.8, 4.6)                        |
| 13    | 164.1, C            |                                            |
| 14    | 134.5, C            |                                            |
| 15    | 154.7, C            |                                            |
| 16    | 123.9, CH           | 7.54, d (7.1)                              |
| 17    | 130.4, CH           | 7.57, d (7.1)                              |
| 18    | 130.8, C            |                                            |
| 19    | 130.0, C            |                                            |
| 20    | 170.8, C            |                                            |
| 21    | 16.9, $\text{CH}_3$ | 2.19, s                                    |
| 1-NH  |                     | 11.24, s                                   |
| 12-NH |                     | 8.01, s                                    |



### III. NMR spectra for inducamides A–C (1–3)

$^1\text{H}$  NMR spectrum of inducamide A (1) in  $\text{CD}_3\text{OD}$  (600 MHz)

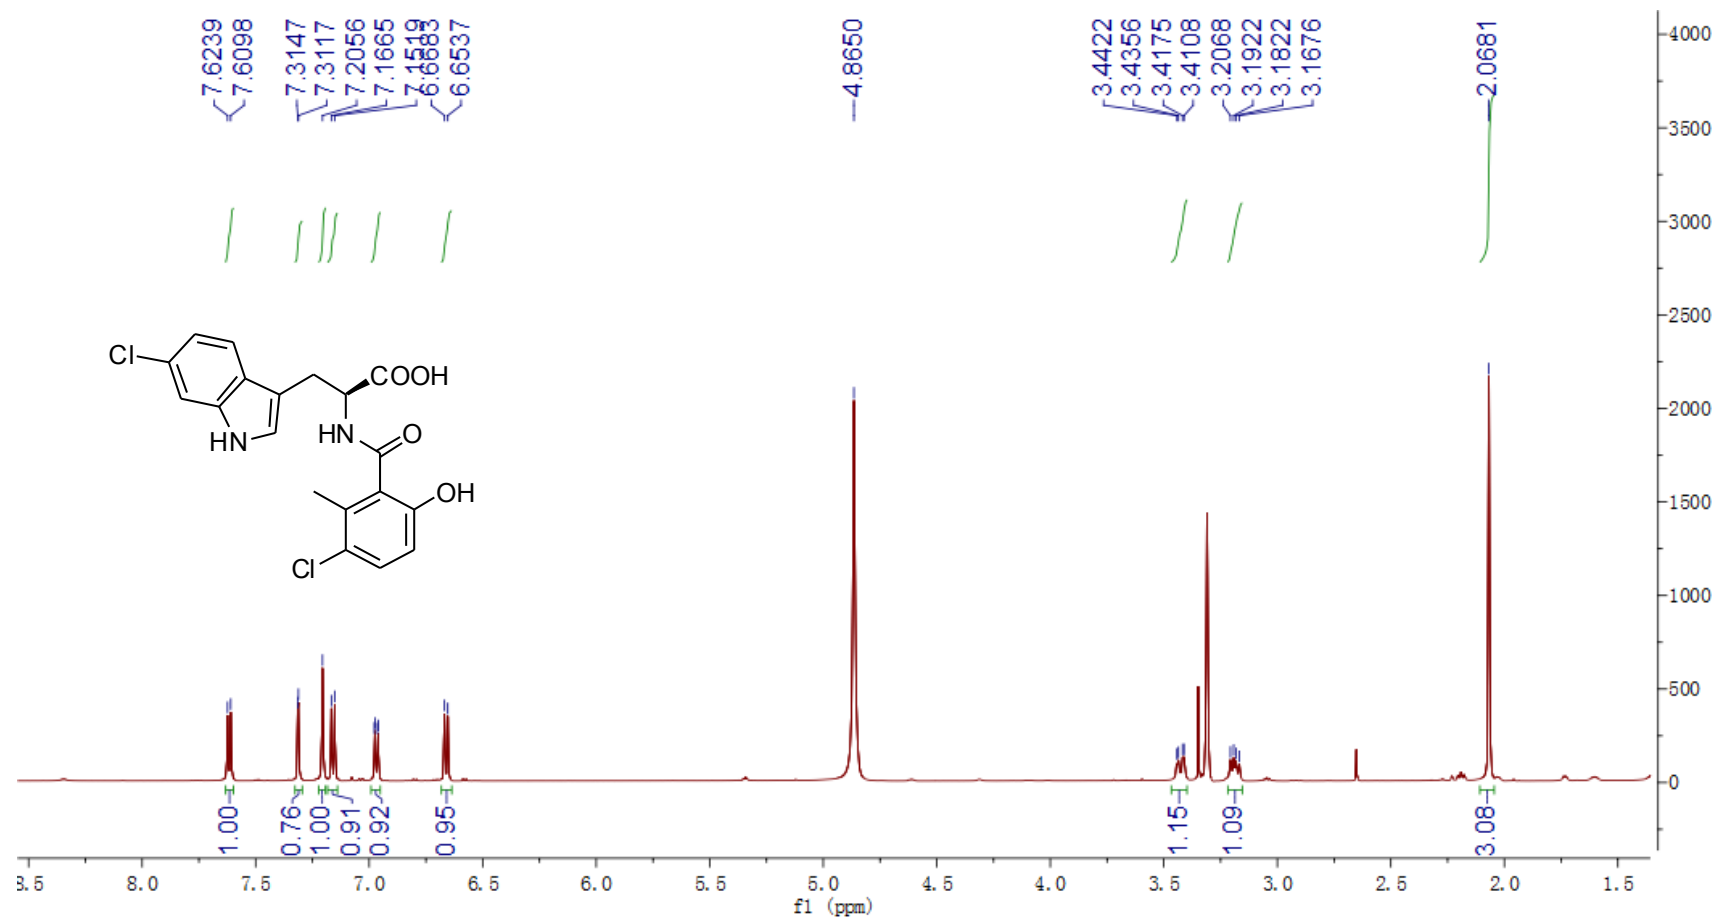

$^{13}\text{C}$  NMR spectrum of inducamide A (**1**) in  $\text{CD}_3\text{OD}$  (100 MHz)

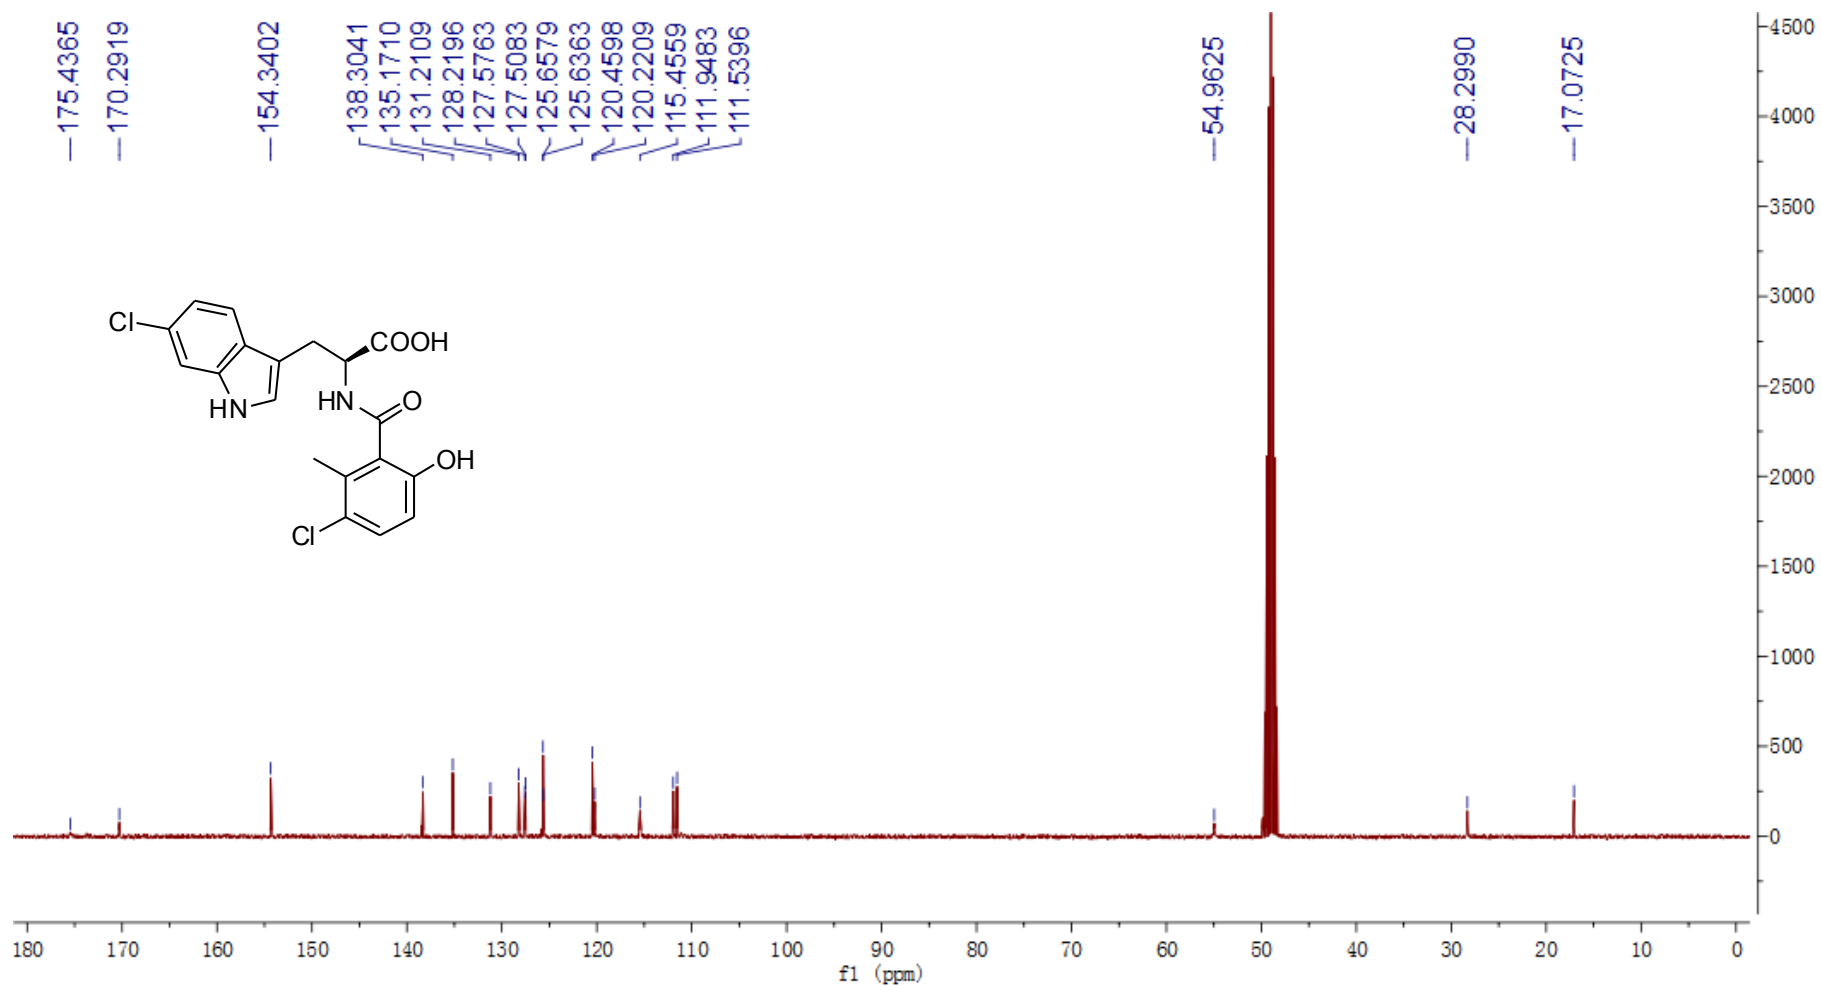

$^1\text{H}$ - $^1\text{H}$  COSY spectrum of inducamide A (**1**) in  $\text{CD}_3\text{OD}$  (600 MHz)

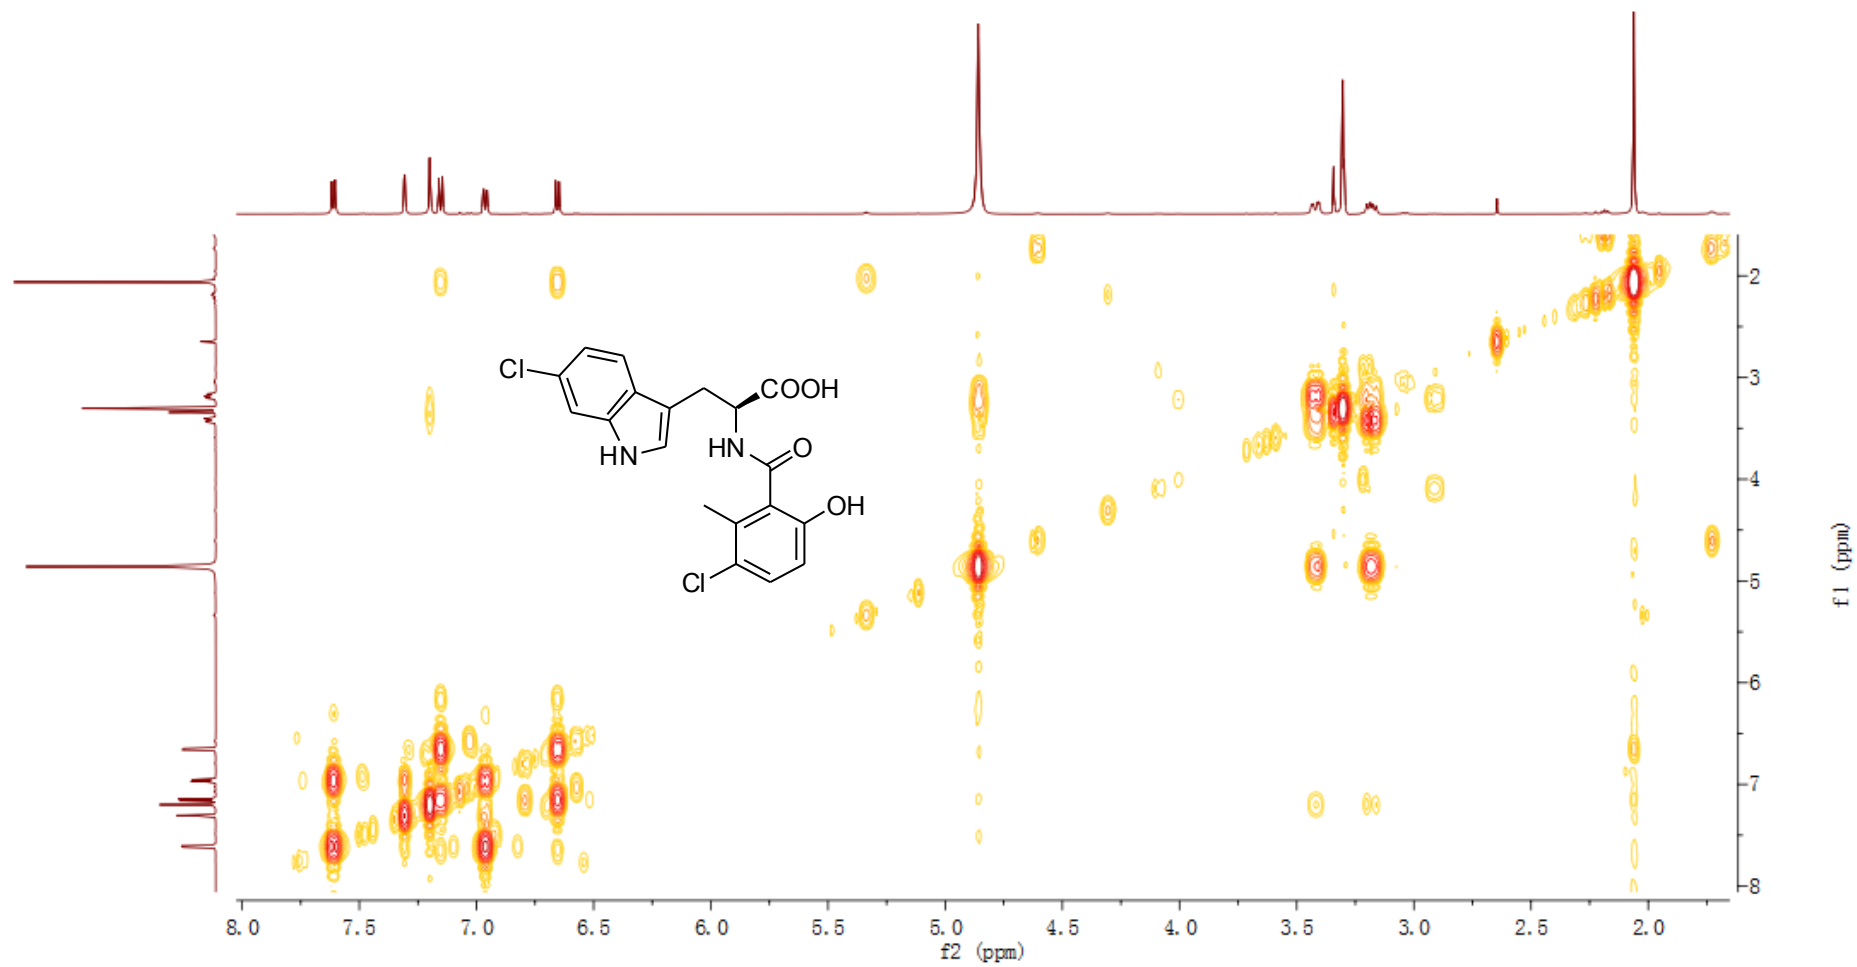

HSQC spectrum of inducamide A (**1**) in CD<sub>3</sub>OD (600 MHz)

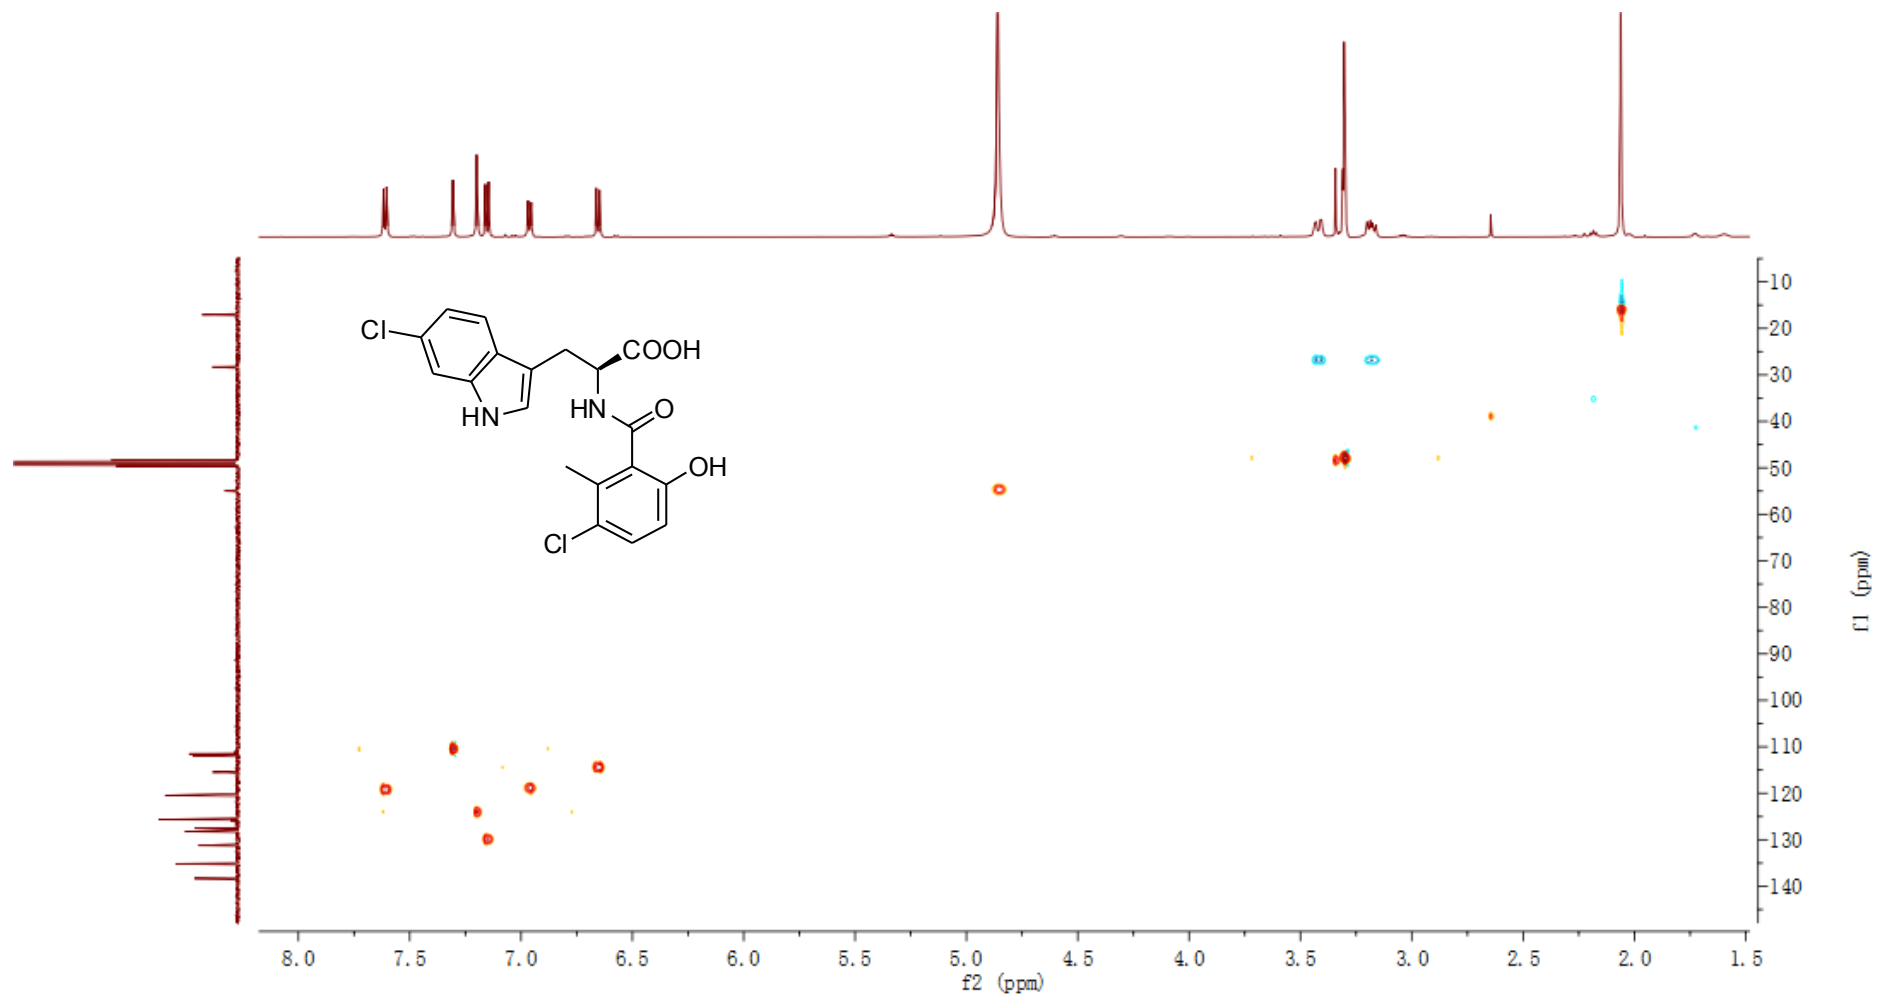

HMBC spectrum of inducamide A (1) in CD<sub>3</sub>OD (600 MHz)

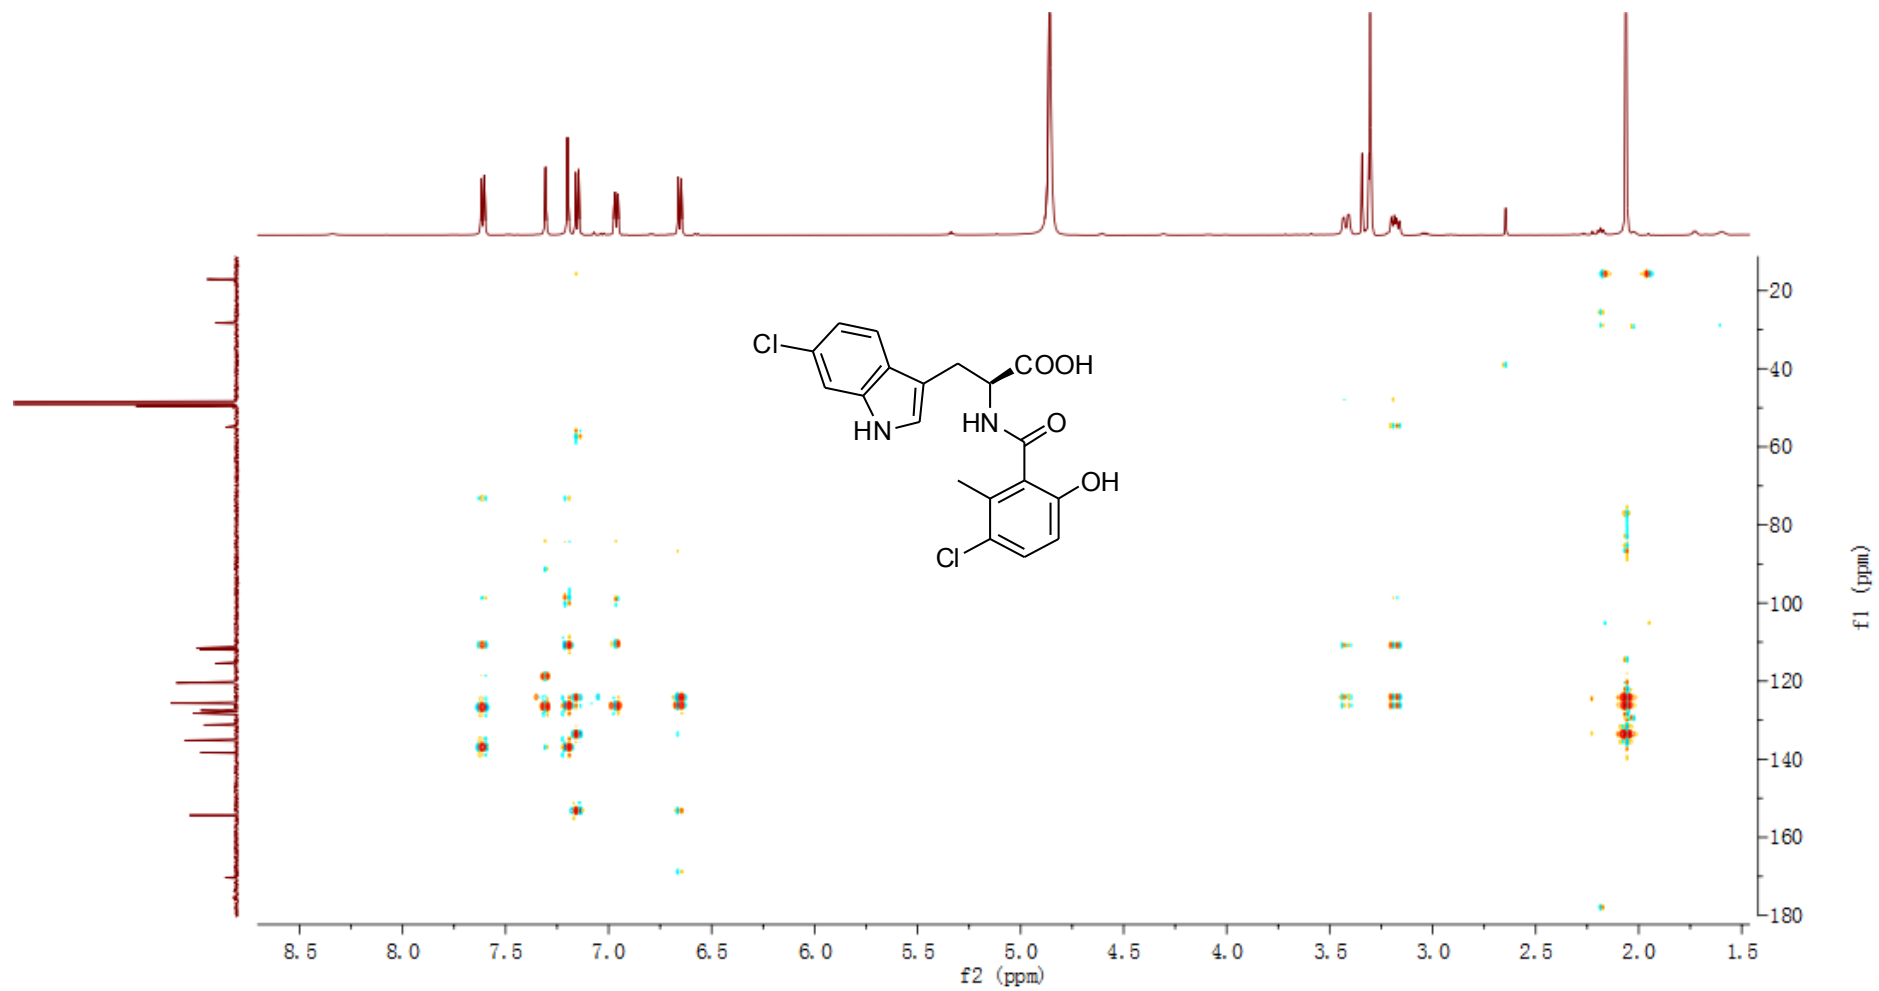

<sup>1</sup>H NMR spectrum of inducamide B (2) in CD<sub>3</sub>OD (600 MHz)

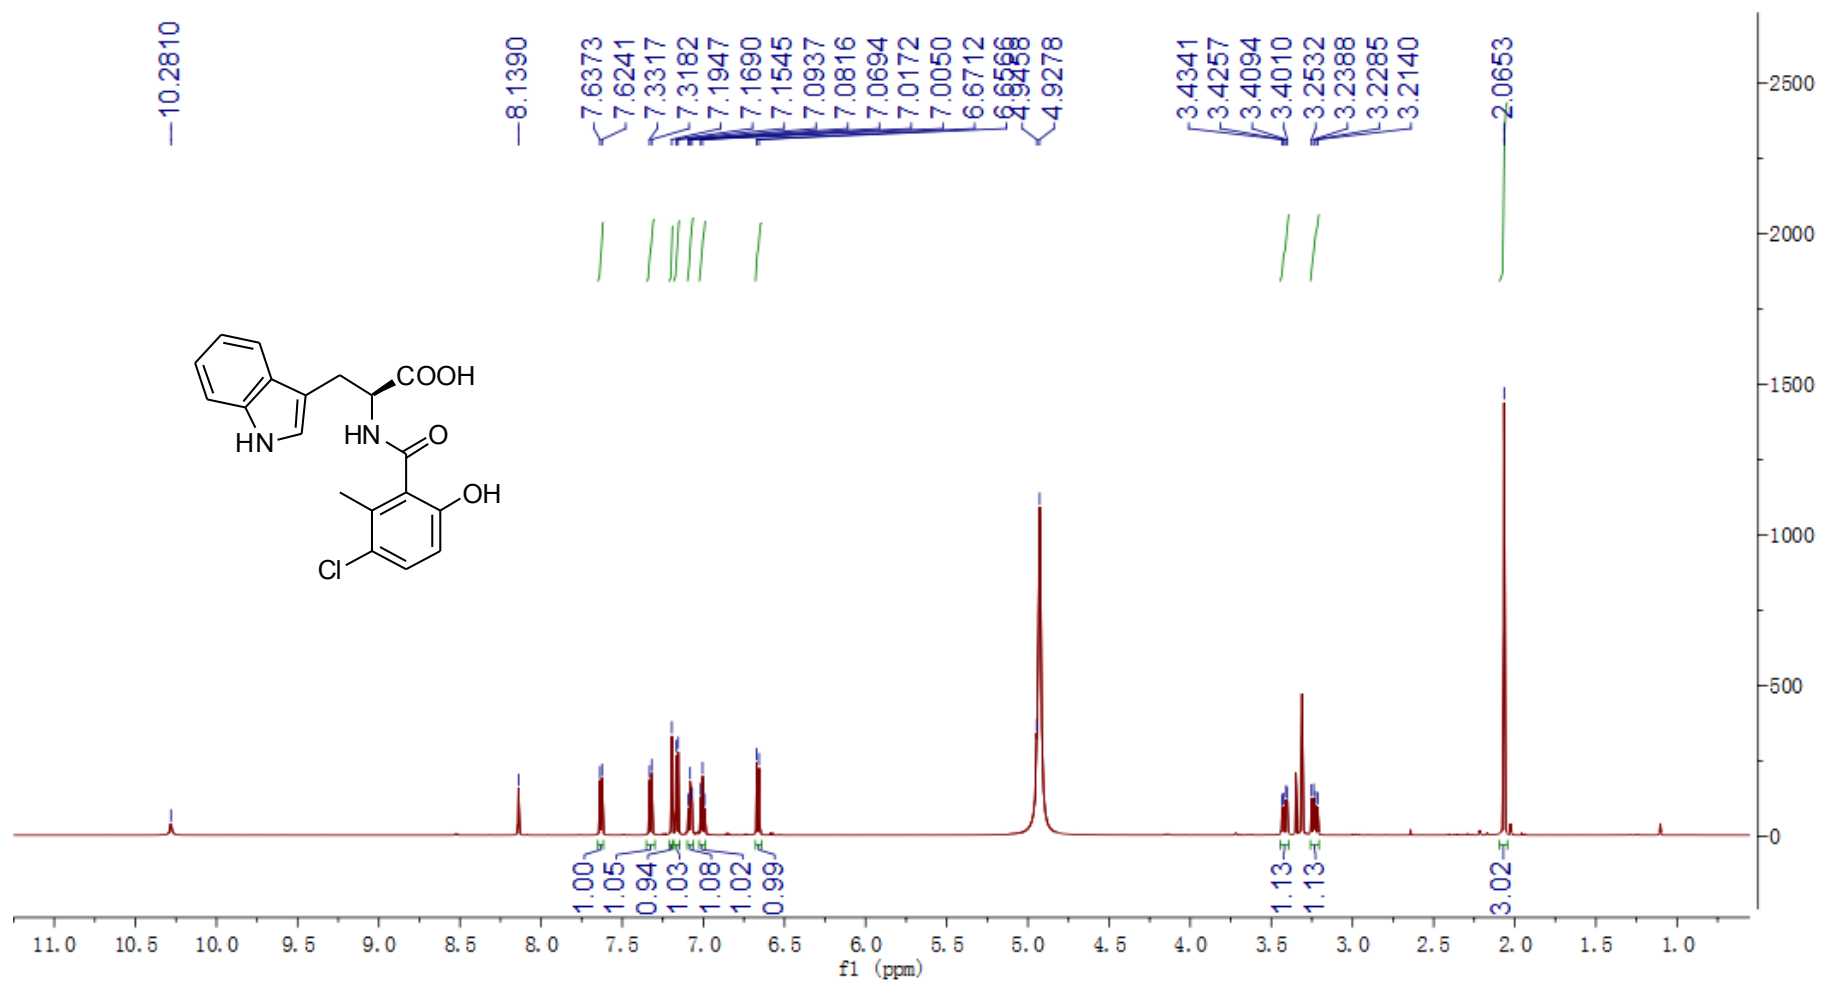

$^{13}\text{C}$  NMR spectrum of inducamide B (2) in  $\text{CD}_3\text{OD}$  (100 MHz)

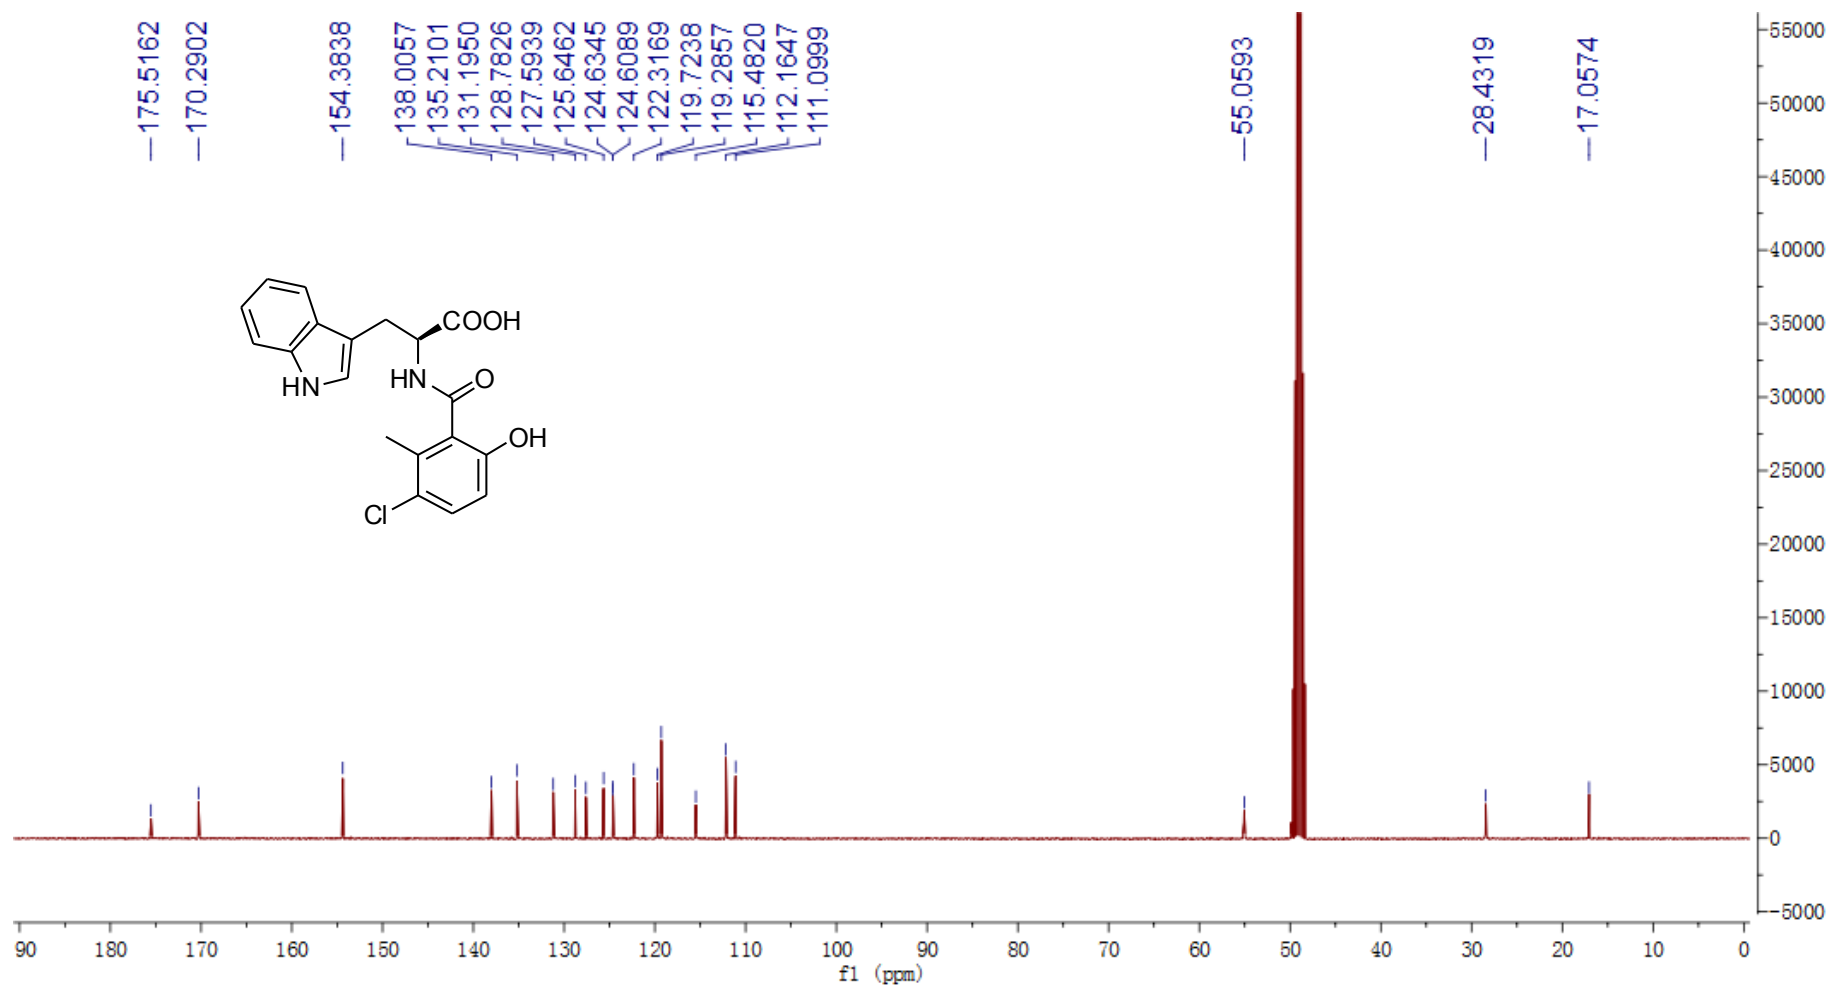

$^1\text{H}$ - $^1\text{H}$  COSY spectrum of inducamide B (**2**) in  $\text{CD}_3\text{OD}$  (600 MHz)

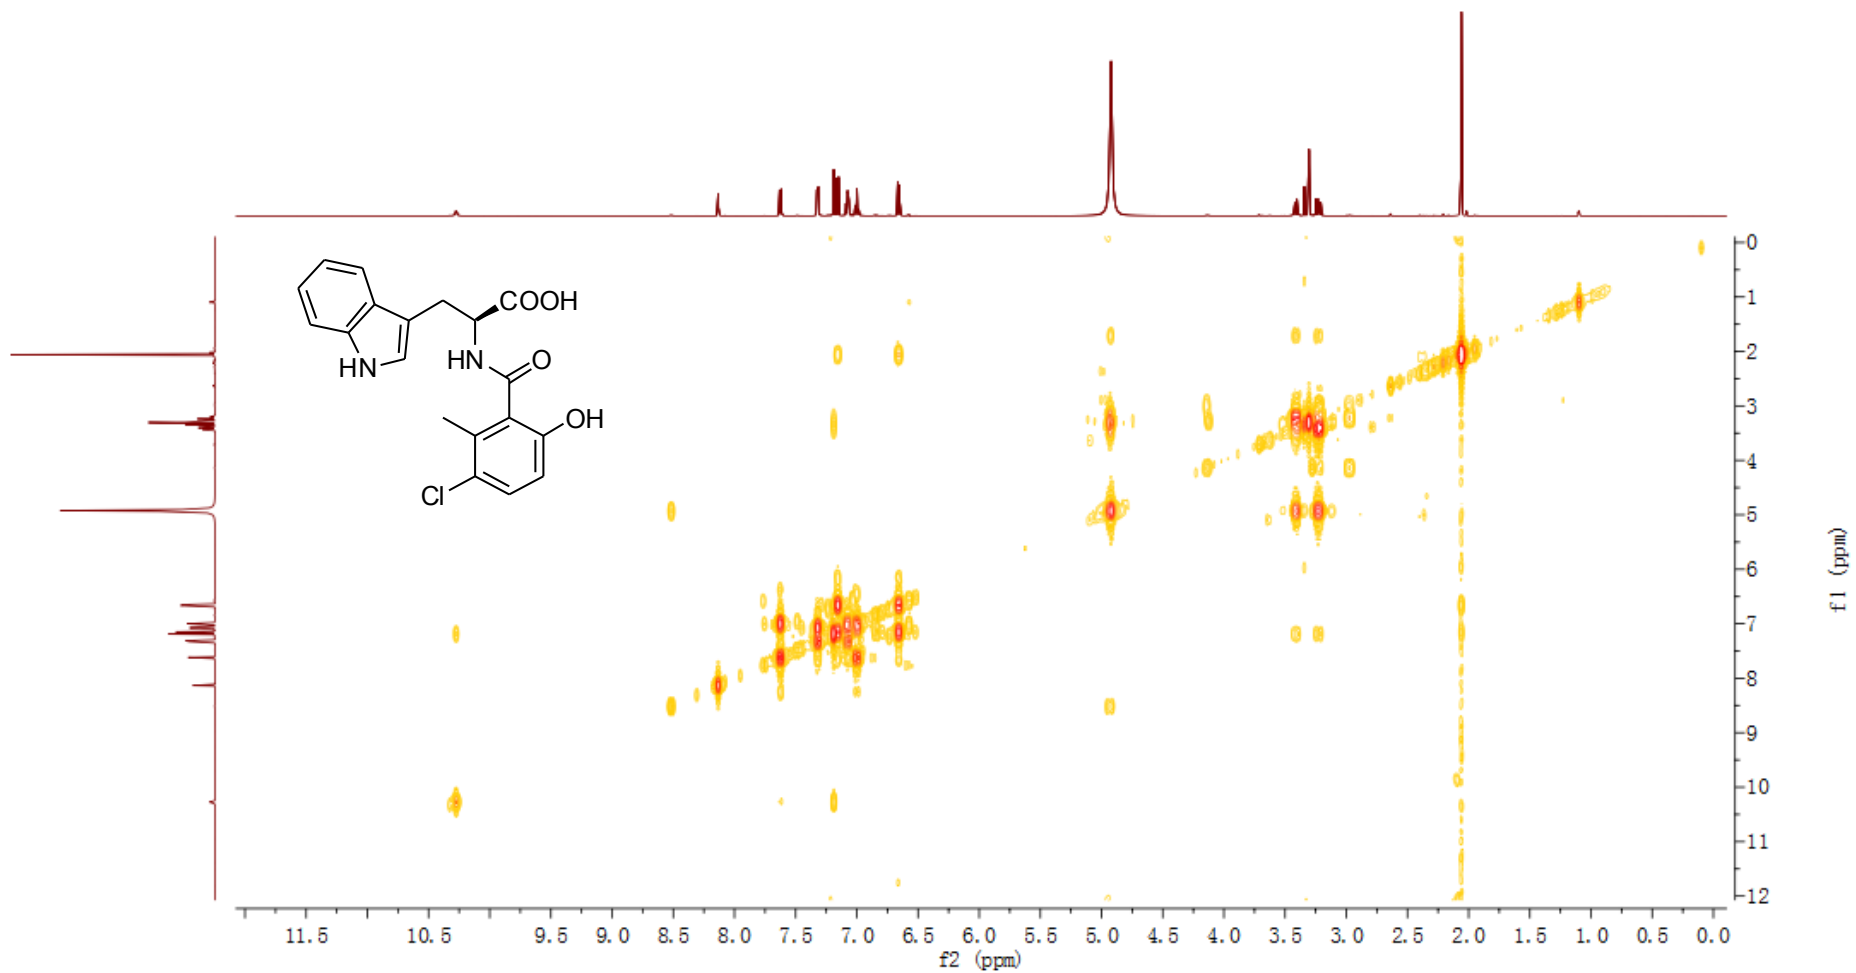



HSQC spectrum of inducamide B (**2**) in CD<sub>3</sub>OD (600 MHz)

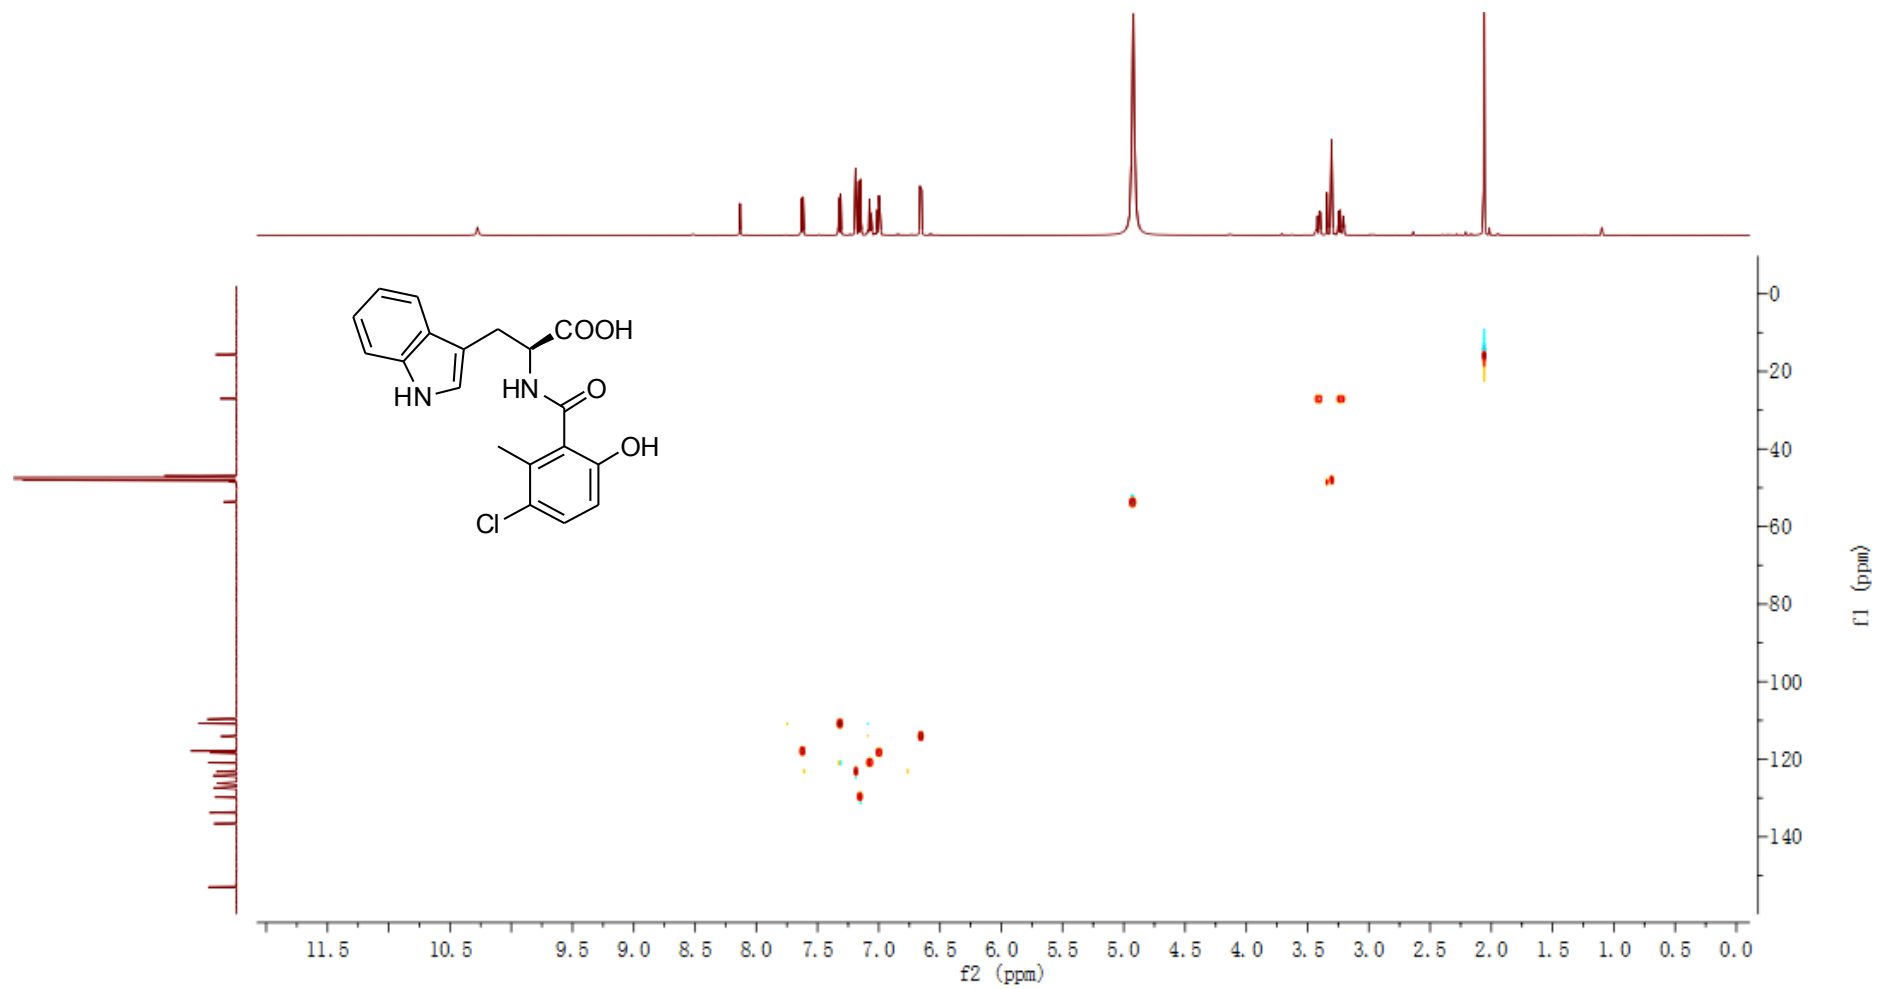

HMBC spectrum of inducamide B (2) in CD<sub>3</sub>OD (600 MHz)

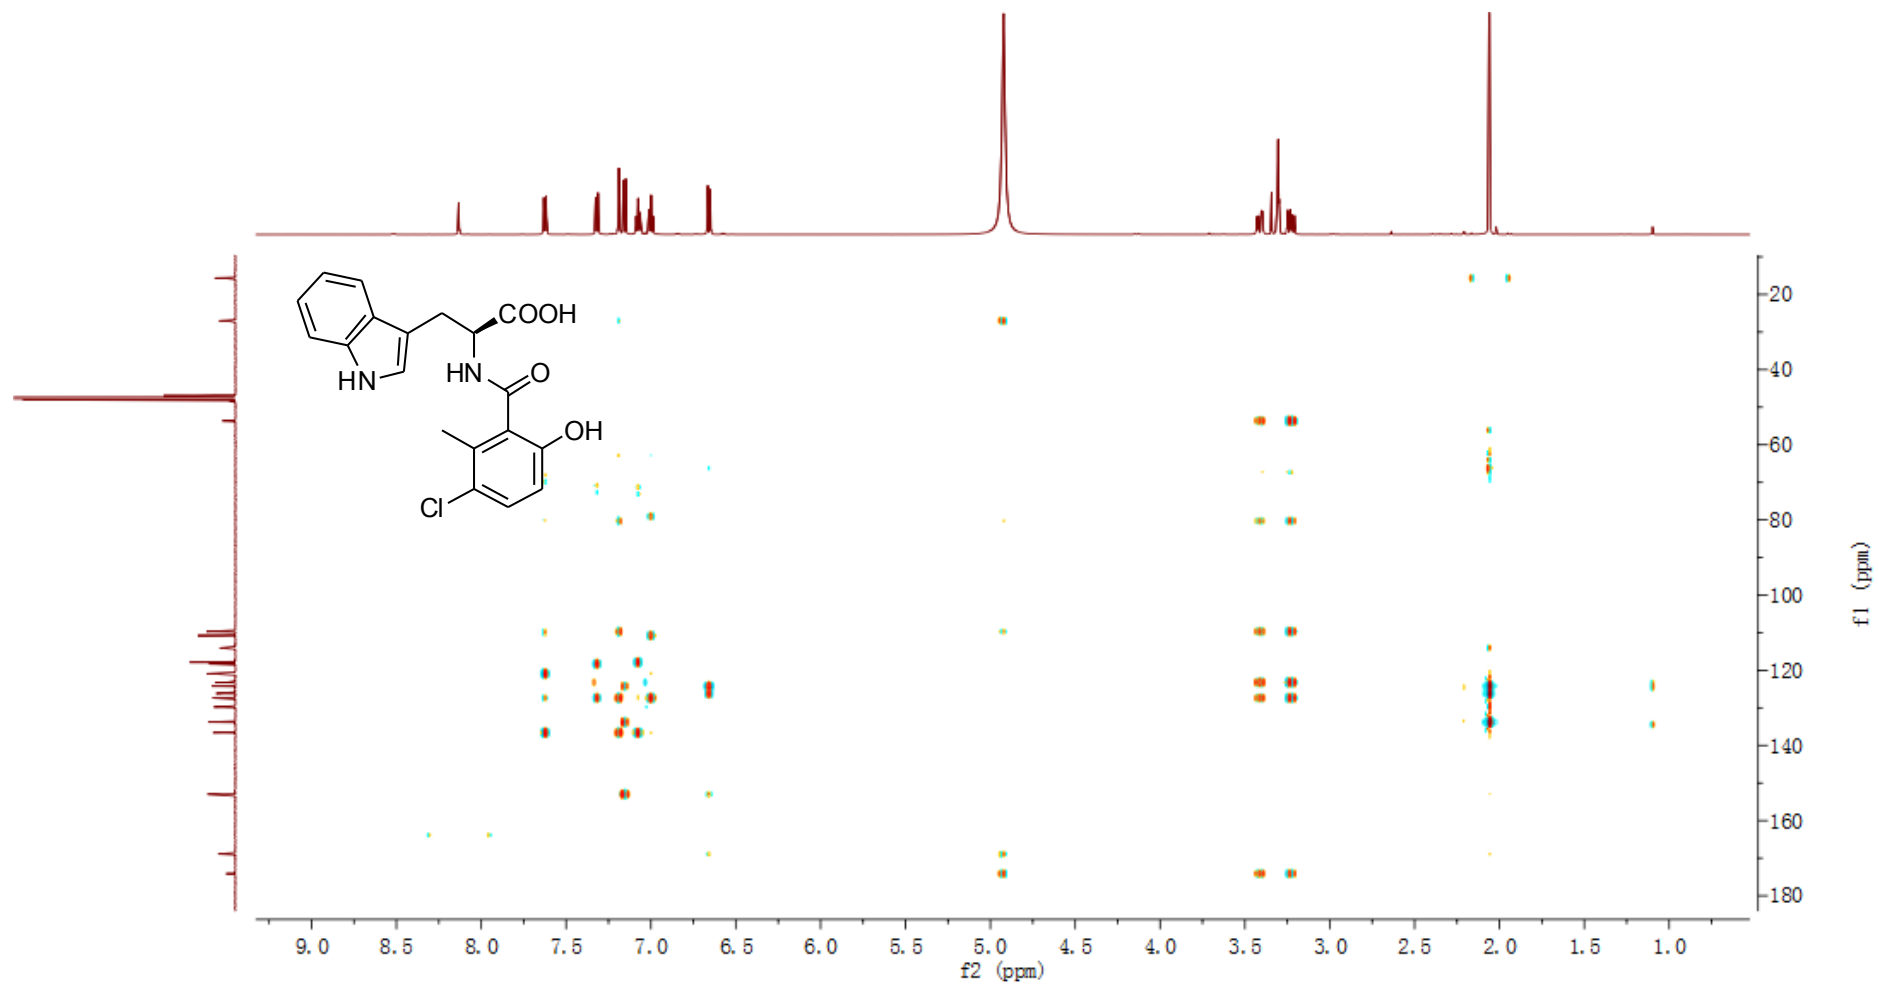

<sup>1</sup>H NMR spectrum of inducamide C (**3**) in DMSO-*d*<sub>6</sub> (600 MHz)

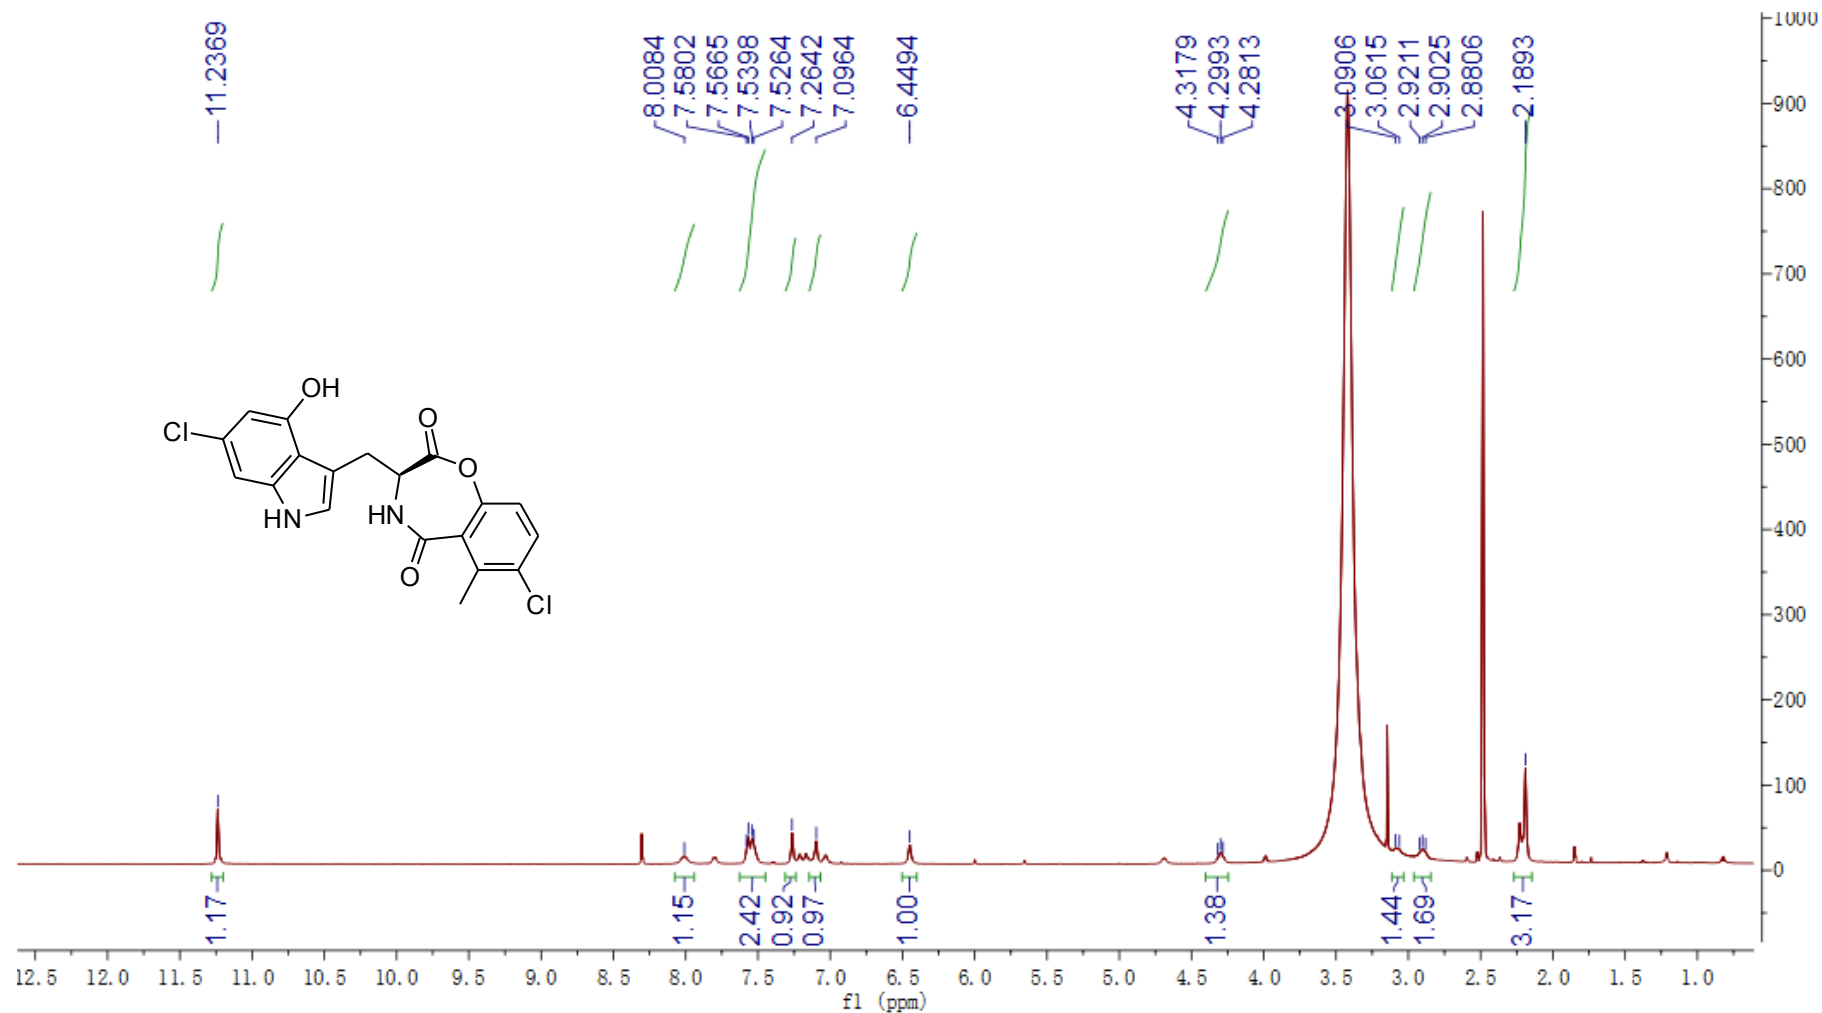

<sup>13</sup>C NMR spectrum of inducamide C (3) in DMSO-*d*<sub>6</sub> (100 MHz)

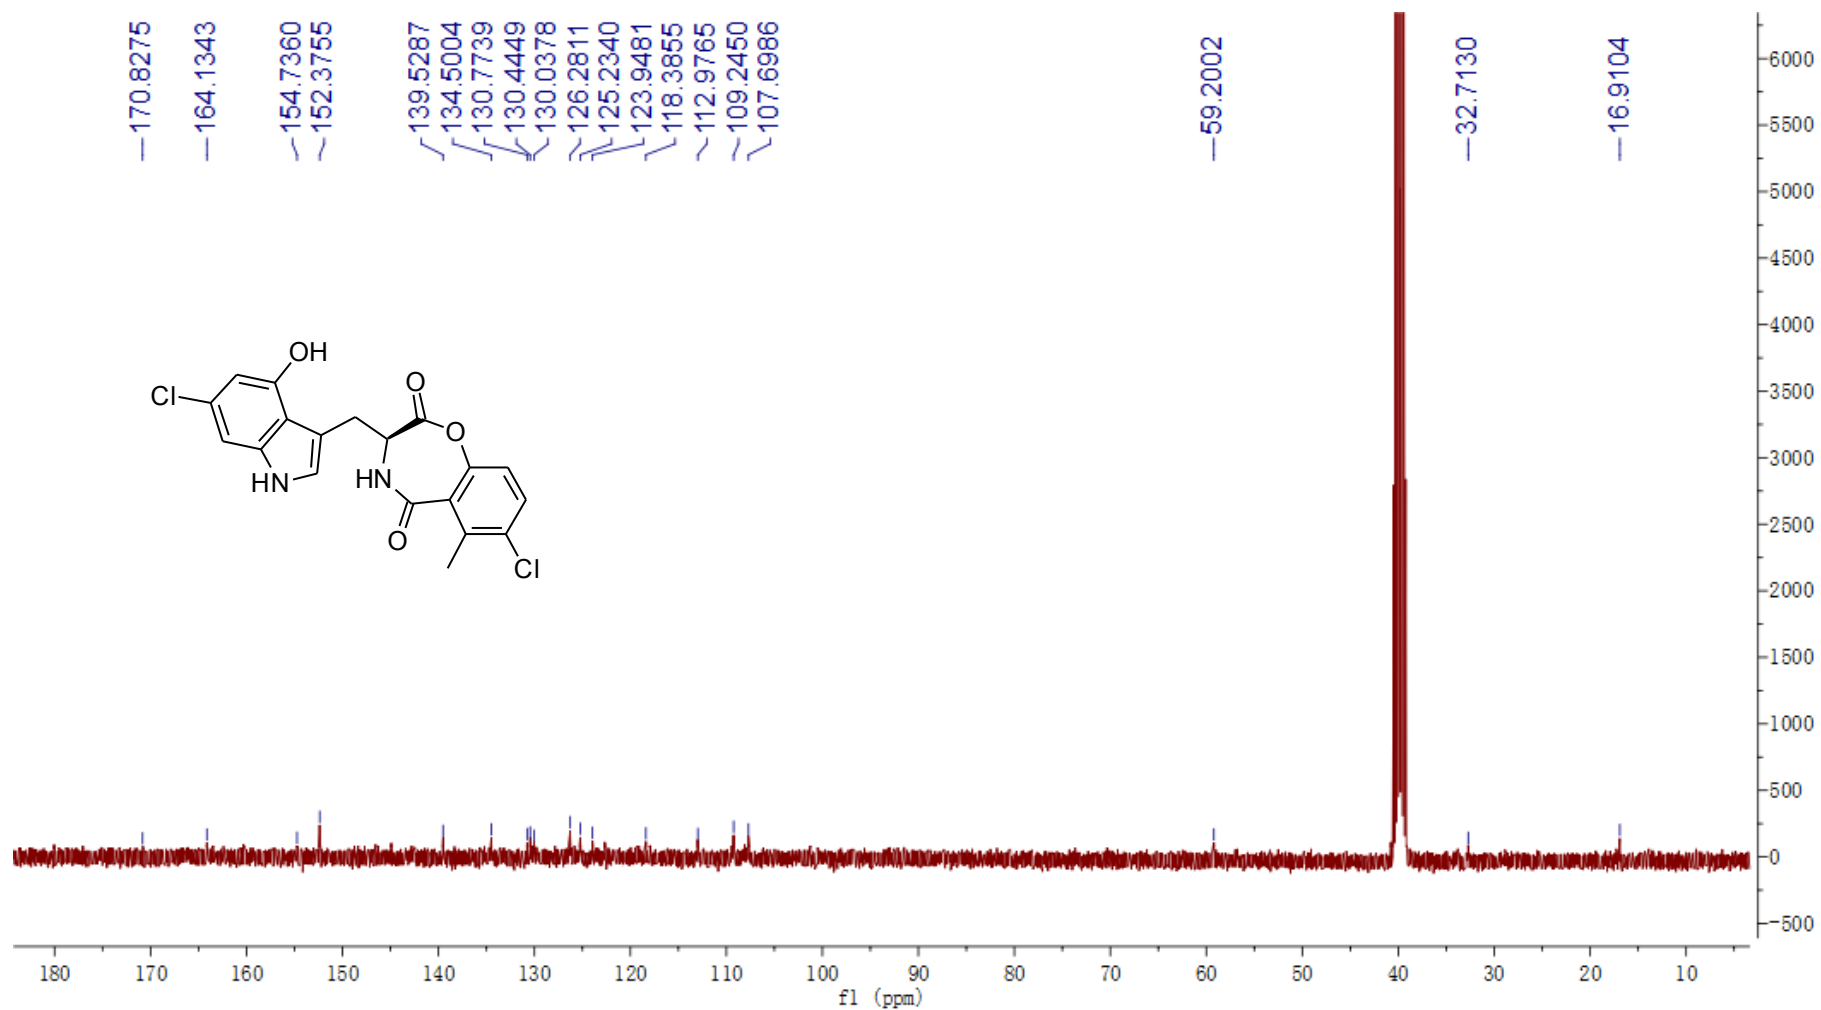

$^1\text{H}$ - $^1\text{H}$  COSY spectrum of inducamide C (**3**) in  $\text{DMSO-}d_6$  (600 MHz)

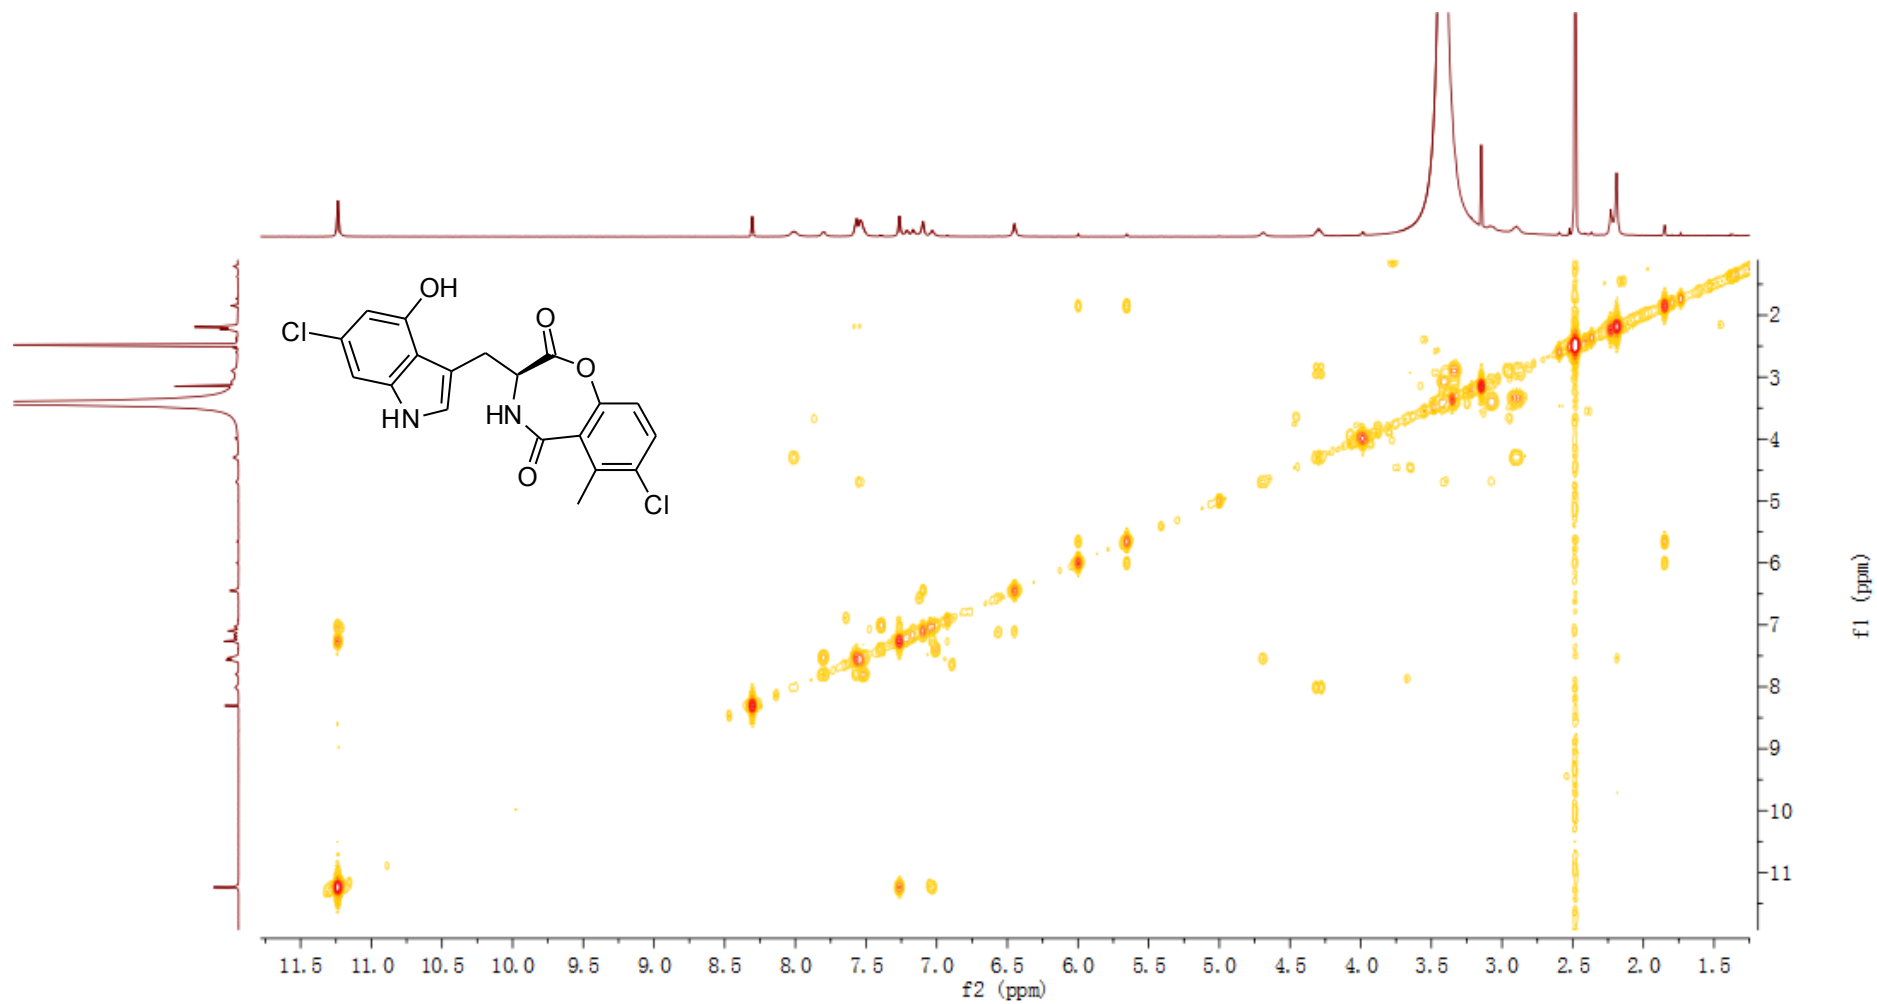

HSQC spectrum of inducamide C (**3**) in DMSO-*d*<sub>6</sub> (600 MHz)

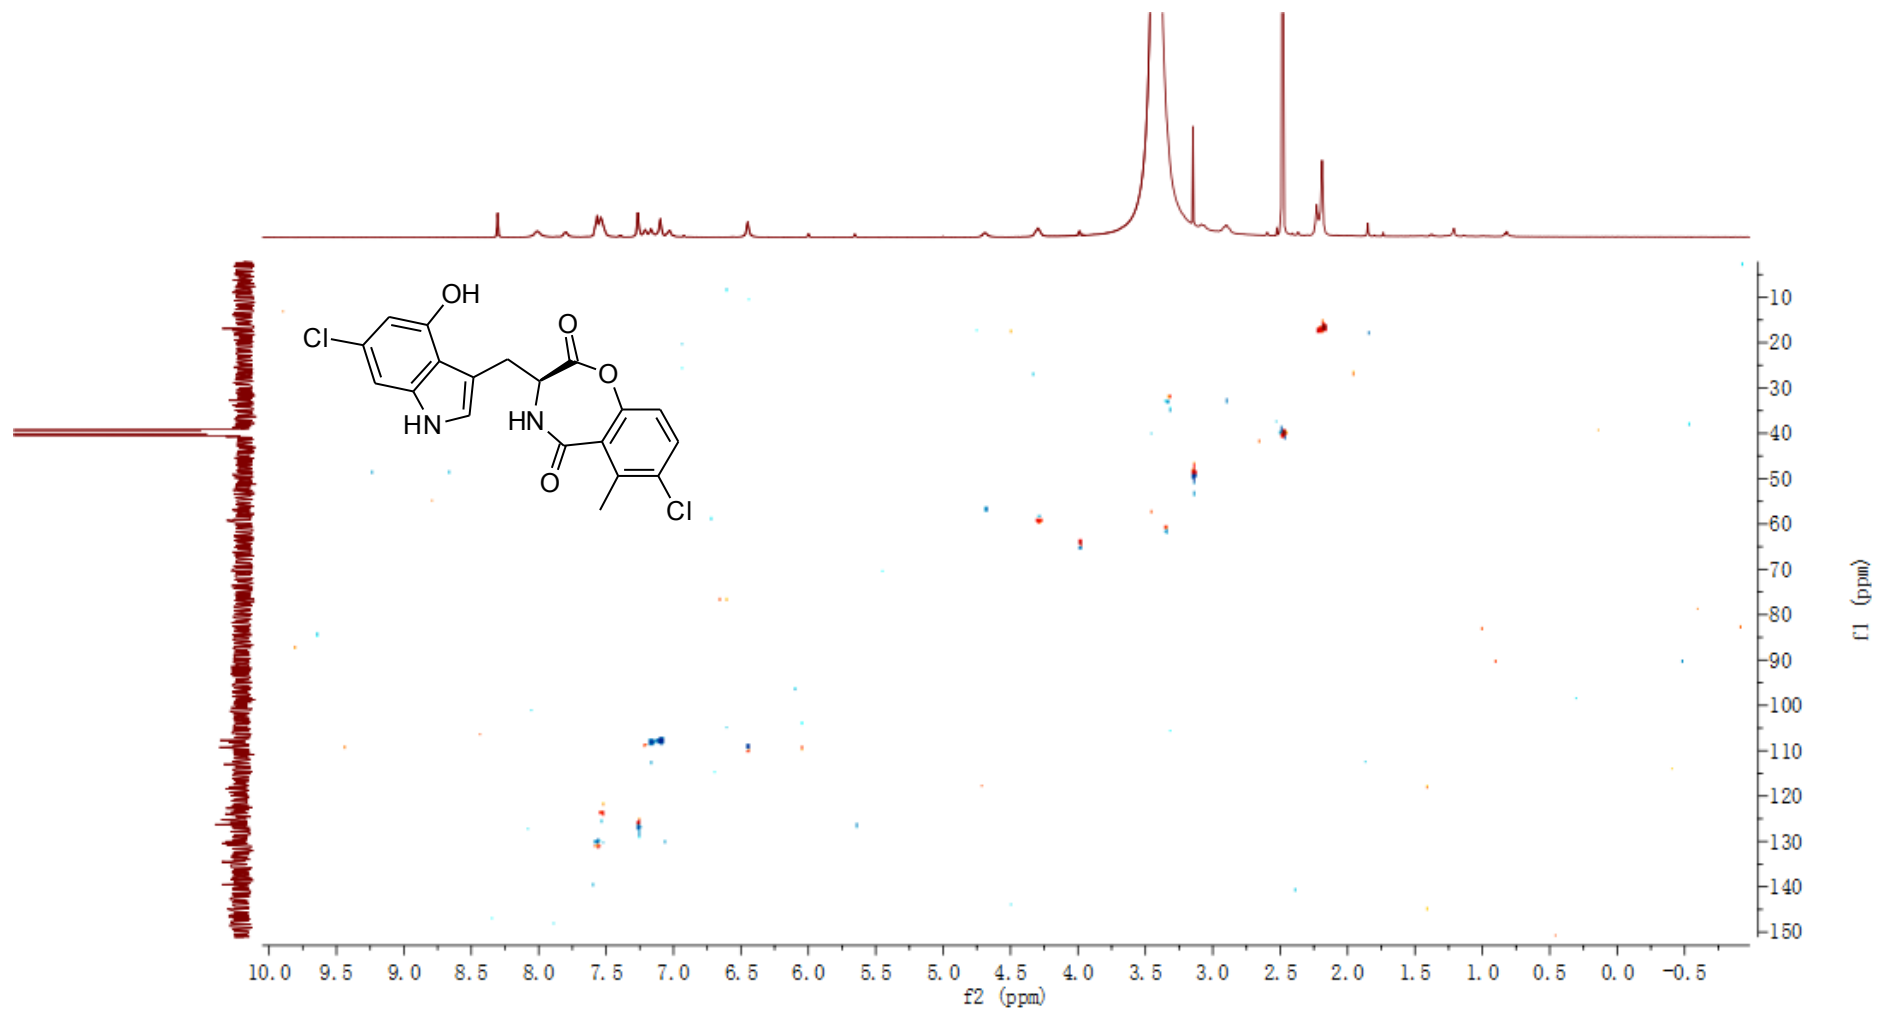

HMBC spectrum of inducamide C (**3**) in DMSO-*d*<sub>6</sub> (600 MHz)

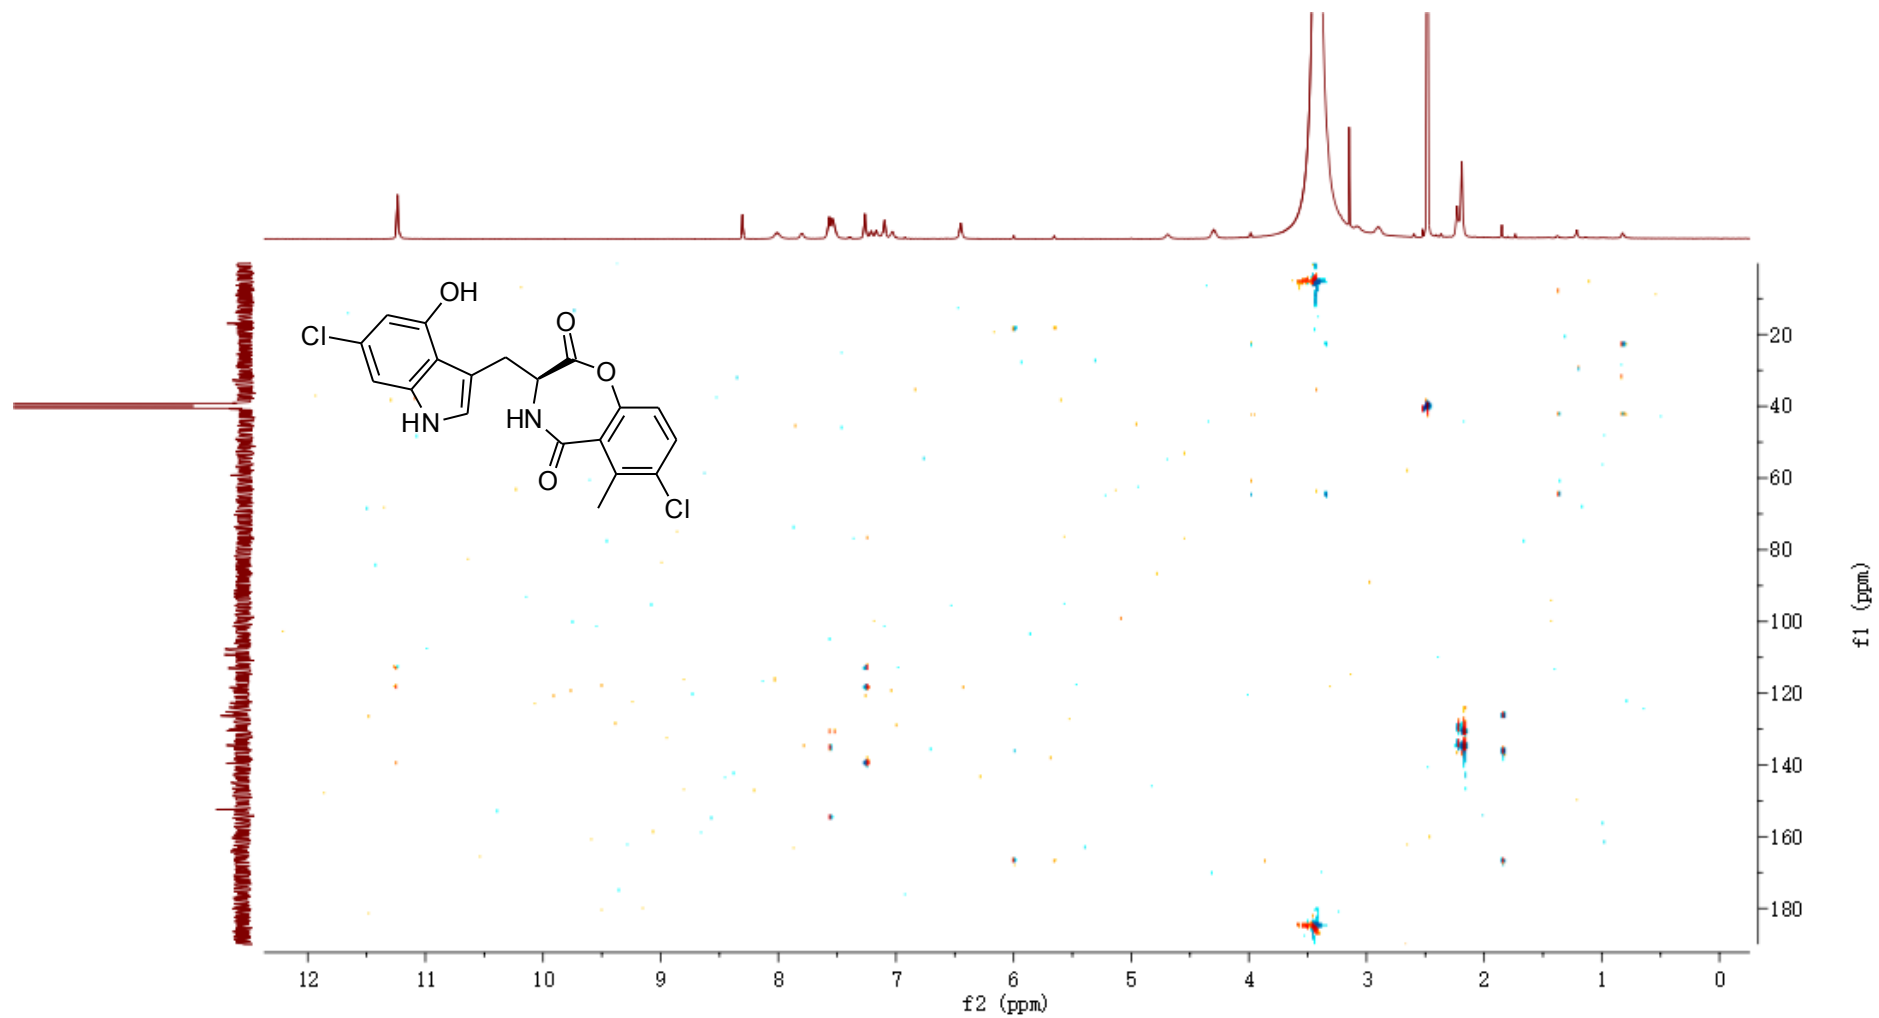

Supplement: ol502731p_si_001.pdf [file ol502731p_si_001.pdf]
